# Supplementary material for: Model-based identification of TNFα-induced IKKβ-mediated and IκBα-mediated regulation of NFκB signal transduction as a tool to quantify the impact of drug-induced liver injury compounds
Source: NPJ Syst Biol Appl. 2018 Jun 11;4:23. doi: 10.1038/s41540-018-0058-z (PMC5995845; doi:10.1038/s41540-018-0058-z)
Supplement: Supplementary file 2 — Data used for model calibration as CSV file [file 41540_2018_58_MOESM2_ESM.csv]

Data used for model calibration
Description of columns
name	Name of the measured target according to names in the manuscript
time	Time in minutes
value	Measured value on log scale
sigma	Uncertainty of the measurement
condition	Unique identifier of the measurement condition
treatment	Treatment of the cells (no, TNF)
compound	Compound (no, DCF, AMD, APAP, FIAU, XIM)
cell	Cell type (HepG2, PHH)
scale	Scale of the measurement (1, 2, 3). If observations agree by name and scale, their values can be directly compared.
	observations with the same name but different scale have no common point of reference. Their values are
	shifted by an unknown offset (log-values), corresponding to an unknown scaling factor on nominal scale.
name	time	value	sigma	condition	treatment	compound	cell	scale
IkBa	0	0.175866517423136	0.098658627685548	TNF_no_HepG2_1	TNF	no	HepG2	1
IkBa	5	-0.130745349027781	0.094656119577904	TNF_no_HepG2_1	TNF	no	HepG2	1
IkBa	10	-1.38158259133861	0.094601971914531	TNF_no_HepG2_1	TNF	no	HepG2	1
IkBa	15	-1.89726795475497	0.107346394863036	TNF_no_HepG2_1	TNF	no	HepG2	1
IkBa	20	-1.9248426571007	0.102696509472777	TNF_no_HepG2_1	TNF	no	HepG2	1
IkBa	25	-1.88961801927116	0.271702356768603	TNF_no_HepG2_1	TNF	no	HepG2	1
IkBa	30	-0.900789534288373	0.093732221036564	TNF_no_HepG2_1	TNF	no	HepG2	1
IkBa	40	-0.022332696768275	0.112883843849205	TNF_no_HepG2_1	TNF	no	HepG2	1
IkBa	50	0.382342864675175	0.110977409493161	TNF_no_HepG2_1	TNF	no	HepG2	1
IkBa	60	0.445467267736319	0.138334448742324	TNF_no_HepG2_1	TNF	no	HepG2	1
IkBa	90	0.194927221330623	0.160173150342481	TNF_no_HepG2_1	TNF	no	HepG2	1
IkBa	70	0.56952403135081	0.124247194666439	TNF_no_HepG2_1	TNF	no	HepG2	1
IkBa	2	0.147962179239954	0.160390639732212	TNF_no_HepG2_1	TNF	no	HepG2	1
IkBa	7	-0.784275172736497	0.200981401817797	TNF_no_HepG2_1	TNF	no	HepG2	1
IkBa	12	-1.38985225514348	0.202196881774634	TNF_no_HepG2_1	TNF	no	HepG2	1
pIkBa	0	-1.16328481099839	0.205436490518216	TNF_no_HepG2_1	TNF	no	HepG2	1
pIkBa	5	1.425422268195	0.160105913769549	TNF_no_HepG2_1	TNF	no	HepG2	1
pIkBa	10	0.297237566144894	0.17278441001207	TNF_no_HepG2_1	TNF	no	HepG2	1
pIkBa	15	-0.724949579995201	0.18438955710849	TNF_no_HepG2_1	TNF	no	HepG2	1
pIkBa	20	-1.01522951930905	0.190954250264165	TNF_no_HepG2_1	TNF	no	HepG2	1
pIkBa	25	-1.02015517033256	0.390775334818389	TNF_no_HepG2_1	TNF	no	HepG2	1
pIkBa	30	-0.130721694459636	0.174725816507142	TNF_no_HepG2_1	TNF	no	HepG2	1
pIkBa	40	0.592273031045855	0.219508668844942	TNF_no_HepG2_1	TNF	no	HepG2	1
pIkBa	50	0.551225372878871	0.217126613417736	TNF_no_HepG2_1	TNF	no	HepG2	1
pIkBa	60	0.785610440035864	0.21690339767851	TNF_no_HepG2_1	TNF	no	HepG2	1
pIkBa	90	0.131800774310561	0.221968980662759	TNF_no_HepG2_1	TNF	no	HepG2	1
pIkBa	70	0.328765462605091	0.267617297630017	TNF_no_HepG2_1	TNF	no	HepG2	1
pIkBa	2	-0.468137367578949	0.274171771026309	TNF_no_HepG2_1	TNF	no	HepG2	1
pIkBa	7	1.26436585271144	0.260493002381916	TNF_no_HepG2_1	TNF	no	HepG2	1
pIkBa	12	-0.311517804527702	0.274391049606511	TNF_no_HepG2_1	TNF	no	HepG2	1
pIKK	0	-0.509605385634014	0.142415596722819	TNF_no_HepG2_1	TNF	no	HepG2	1
pIKK	5	0.607058578133106	0.128536878340955	TNF_no_HepG2_1	TNF	no	HepG2	1
pIKK	10	0.927234529579504	0.126924708230615	TNF_no_HepG2_1	TNF	no	HepG2	1
pIKK	20	0.527292341887533	0.142210693042638	TNF_no_HepG2_1	TNF	no	HepG2	1
pIKK	50	-0.028972951602826	0.194670959063419	TNF_no_HepG2_1	TNF	no	HepG2	1
pIKK	15	0.811424480200669	0.141041350029786	TNF_no_HepG2_1	TNF	no	HepG2	1
pIKK	30	0.300951427822119	0.135561395661462	TNF_no_HepG2_1	TNF	no	HepG2	1
pIKK	60	-0.250774167586707	0.192406395170391	TNF_no_HepG2_1	TNF	no	HepG2	1
pIKK	90	-0.460225400748837	0.187312890935789	TNF_no_HepG2_1	TNF	no	HepG2	1
pIKK	120	-0.390975634136483	0.271003906236439	TNF_no_HepG2_1	TNF	no	HepG2	1
pIKK	180	-0.74063456979126	0.381622329065795	TNF_no_HepG2_1	TNF	no	HepG2	1
pIKK	240	-0.524739949026005	0.308294394676781	TNF_no_HepG2_1	TNF	no	HepG2	1
pIKK	25	0.197573973357651	0.374718105976542	TNF_no_HepG2_1	TNF	no	HepG2	1
pIKK	40	0.065782304409452	0.188700322799733	TNF_no_HepG2_1	TNF	no	HepG2	1
pIKK	70	0.030005502414881	0.301075715779489	TNF_no_HepG2_1	TNF	no	HepG2	1
pIKK	2	0.134379600939877	0.231906881177262	TNF_no_HepG2_1	TNF	no	HepG2	1
pIKK	7	0.918614223816965	0.211914117057753	TNF_no_HepG2_1	TNF	no	HepG2	1
pIKK	12	0.948052337489242	0.227604911822893	TNF_no_HepG2_1	TNF	no	HepG2	1
pNFkB	0	-1.05079879786996	0.145904728573732	TNF_no_HepG2_1	TNF	no	HepG2	1
pNFkB	5	1.33124341729084	0.148167818357689	TNF_no_HepG2_1	TNF	no	HepG2	1
pNFkB	10	1.19456846171915	0.13604219113488	TNF_no_HepG2_1	TNF	no	HepG2	1
pNFkB	15	0.349859666499336	0.15218591316773	TNF_no_HepG2_1	TNF	no	HepG2	1
pNFkB	20	0.02517834858133	0.140322351513908	TNF_no_HepG2_1	TNF	no	HepG2	1
pNFkB	30	0.031828351345423	0.141729576338592	TNF_no_HepG2_1	TNF	no	HepG2	1
pNFkB	60	0.364601086268132	0.190716864631114	TNF_no_HepG2_1	TNF	no	HepG2	1
pNFkB	90	0.003154824321541	0.227734846240677	TNF_no_HepG2_1	TNF	no	HepG2	1
pNFkB	120	0.297132249588531	0.239510540364599	TNF_no_HepG2_1	TNF	no	HepG2	1
pNFkB	180	-0.237643961418338	0.328523765318892	TNF_no_HepG2_1	TNF	no	HepG2	1
pNFkB	240	-0.139724269773728	0.242191006178611	TNF_no_HepG2_1	TNF	no	HepG2	1
pNFkB	360	-2.40046745711749	0.341865060486449	TNF_no_HepG2_1	TNF	no	HepG2	1
pNFkB	40	0.33440078721728	0.314790232800384	TNF_no_HepG2_1	TNF	no	HepG2	1
pNFkB	50	0.913296762377578	0.306436309827721	TNF_no_HepG2_1	TNF	no	HepG2	1
pNFkB	70	-0.011777472576482	0.317851656941941	TNF_no_HepG2_1	TNF	no	HepG2	1
pNFkB	2	-0.409756983477188	0.193035409335544	TNF_no_HepG2_1	TNF	no	HepG2	1
pNFkB	12	0.749403029551881	0.193653696630244	TNF_no_HepG2_1	TNF	no	HepG2	1
nuclear NFkB	0	0.050518908947653	0.028558446424521	TNF_no_HepG2_1	TNF	no	HepG2	1
nuclear NFkB	6	0.100423454754363	0.027179775207672	TNF_no_HepG2_1	TNF	no	HepG2	1
nuclear NFkB	12	0.416381567981862	0.019894437847552	TNF_no_HepG2_1	TNF	no	HepG2	1
nuclear NFkB	18	0.608039301385196	0.016488553047899	TNF_no_HepG2_1	TNF	no	HepG2	1
nuclear NFkB	30	0.598032795094298	0.016650363881296	TNF_no_HepG2_1	TNF	no	HepG2	1
nuclear NFkB	36	0.503968834240447	0.018255170765401	TNF_no_HepG2_1	TNF	no	HepG2	1
nuclear NFkB	42	0.354271253754844	0.021148617507375	TNF_no_HepG2_1	TNF	no	HepG2	1
nuclear NFkB	54	0.057349017279096	0.028365633674562	TNF_no_HepG2_1	TNF	no	HepG2	1
nuclear NFkB	60	-0.010658572657609	0.030345963817505	TNF_no_HepG2_1	TNF	no	HepG2	1
nuclear NFkB	72	-0.042228723206088	0.031312397729543	TNF_no_HepG2_1	TNF	no	HepG2	1
nuclear NFkB	84	-0.035306330141046	0.031097850306139	TNF_no_HepG2_1	TNF	no	HepG2	1
nuclear NFkB	96	0.062783531865621	0.028213164220658	TNF_no_HepG2_1	TNF	no	HepG2	1
nuclear NFkB	108	0.198628674356539	0.024661355982774	TNF_no_HepG2_1	TNF	no	HepG2	1
nuclear NFkB	126	0.267070472078133	0.023048296239228	TNF_no_HepG2_1	TNF	no	HepG2	1
nuclear NFkB	138	0.196388281119852	0.024716068728497	TNF_no_HepG2_1	TNF	no	HepG2	1
nuclear NFkB	156	0.069916267698345	0.028014313398921	TNF_no_HepG2_1	TNF	no	HepG2	1
nuclear NFkB	174	0.051535768652387	0.028529656206432	TNF_no_HepG2_1	TNF	no	HepG2	1
nuclear NFkB	186	0.090231445725233	0.027455730494326	TNF_no_HepG2_1	TNF	no	HepG2	1
nuclear NFkB	210	0.164971844444223	0.025496484687988	TNF_no_HepG2_1	TNF	no	HepG2	1
nuclear NFkB	228	0.131948092489167	0.026343970833493	TNF_no_HepG2_1	TNF	no	HepG2	1
nuclear NFkB	246	0.081931435899945	0.027682564397385	TNF_no_HepG2_1	TNF	no	HepG2	1
nuclear NFkB	270	0.073349881151721	0.027919097692561	TNF_no_HepG2_1	TNF	no	HepG2	1
nuclear NFkB	288	0.093157719931588	0.027376209280901	TNF_no_HepG2_1	TNF	no	HepG2	1
nuclear NFkB	312	0.091514476254396	0.027420835143688	TNF_no_HepG2_1	TNF	no	HepG2	1
nuclear NFkB	336	0.077270914157959	0.027810768468801	TNF_no_HepG2_1	TNF	no	HepG2	1
nuclear NFkB	360	0.062526236663041	0.028220363914567	TNF_no_HepG2_1	TNF	no	HepG2	1
cytoplasmic NFkB	0	0.144407148011508	0.016032244998773	TNF_no_HepG2_1	TNF	no	HepG2	1
cytoplasmic NFkB	6	0.129169585997125	0.016275774273052	TNF_no_HepG2_1	TNF	no	HepG2	1
cytoplasmic NFkB	12	-0.012268225890727	0.018724360986403	TNF_no_HepG2_1	TNF	no	HepG2	1
cytoplasmic NFkB	18	-0.105880896500533	0.020547986574315	TNF_no_HepG2_1	TNF	no	HepG2	1
cytoplasmic NFkB	30	-0.128443892054407	0.021013837870418	TNF_no_HepG2_1	TNF	no	HepG2	1
cytoplasmic NFkB	36	-0.093907375042599	0.020305036440851	TNF_no_HepG2_1	TNF	no	HepG2	1
cytoplasmic NFkB	42	-0.035856667694662	0.019167798982023	TNF_no_HepG2_1	TNF	no	HepG2	1
cytoplasmic NFkB	54	0.041375539603268	0.017754321272289	TNF_no_HepG2_1	TNF	no	HepG2	1
cytoplasmic NFkB	60	0.05004457735397	0.017602426556183	TNF_no_HepG2_1	TNF	no	HepG2	1
cytoplasmic NFkB	72	0.046388935179447	0.017666317037006	TNF_no_HepG2_1	TNF	no	HepG2	1
cytoplasmic NFkB	84	0.034164637813143	0.017881683442491	TNF_no_HepG2_1	TNF	no	HepG2	1
cytoplasmic NFkB	96	-0.000264959346953	0.018502727233361	TNF_no_HepG2_1	TNF	no	HepG2	1
cytoplasmic NFkB	108	-0.048926982315839	0.019418083052247	TNF_no_HepG2_1	TNF	no	HepG2	1
cytoplasmic NFkB	126	-0.079452619775581	0.020015615496981	TNF_no_HepG2_1	TNF	no	HepG2	1
cytoplasmic NFkB	138	-0.056459628232467	0.019563830095976	TNF_no_HepG2_1	TNF	no	HepG2	1
cytoplasmic NFkB	156	-0.023190171340601	0.018928372049128	TNF_no_HepG2_1	TNF	no	HepG2	1
cytoplasmic NFkB	174	-0.025413382732551	0.018970175285675	TNF_no_HepG2_1	TNF	no	HepG2	1
cytoplasmic NFkB	186	-0.043512470080983	0.019314000267736	TNF_no_HepG2_1	TNF	no	HepG2	1
cytoplasmic NFkB	210	-0.065259834989003	0.019735509327864	TNF_no_HepG2_1	TNF	no	HepG2	1
cytoplasmic NFkB	228	-0.065481100610558	0.019739845413032	TNF_no_HepG2_1	TNF	no	HepG2	1
cytoplasmic NFkB	246	-0.061672600454773	0.019665343668506	TNF_no_HepG2_1	TNF	no	HepG2	1
cytoplasmic NFkB	270	-0.067185494927022	0.019773279305403	TNF_no_HepG2_1	TNF	no	HepG2	1
cytoplasmic NFkB	288	-0.07760480973188	0.019978920410817	TNF_no_HepG2_1	TNF	no	HepG2	1
cytoplasmic NFkB	312	-0.08123986895392	0.020051172934227	TNF_no_HepG2_1	TNF	no	HepG2	1
cytoplasmic NFkB	336	-0.080416273971812	0.020034779552639	TNF_no_HepG2_1	TNF	no	HepG2	1
cytoplasmic NFkB	360	-0.087400617858562	0.020174233244699	TNF_no_HepG2_1	TNF	no	HepG2	1
A20	40	-0.389736821017435	0.020271329024793	TNF_no_HepG2_1	TNF	no	HepG2	1
A20	50	-0.343467452492474	0.019391007247532	TNF_no_HepG2_1	TNF	no	HepG2	1
A20	60	-0.216506222364963	0.017182987782715	TNF_no_HepG2_1	TNF	no	HepG2	1
A20	70	-0.106611566047726	0.015496234781371	TNF_no_HepG2_1	TNF	no	HepG2	1
A20	80	-0.042699223680348	0.014602260517408	TNF_no_HepG2_1	TNF	no	HepG2	1
A20	100	0.0792862737882	0.013057763073346	TNF_no_HepG2_1	TNF	no	HepG2	1
A20	110	0.126174569983113	0.012516594017738	TNF_no_HepG2_1	TNF	no	HepG2	1
A20	120	0.156979641261284	0.012175952687727	TNF_no_HepG2_1	TNF	no	HepG2	1
A20	140	0.245398374830728	0.011260552115179	TNF_no_HepG2_1	TNF	no	HepG2	1
A20	150	0.280712290232861	0.010919571398877	TNF_no_HepG2_1	TNF	no	HepG2	1
A20	170	0.277584514048621	0.010949225968472	TNF_no_HepG2_1	TNF	no	HepG2	1
A20	190	0.336934734275922	0.010404129441029	TNF_no_HepG2_1	TNF	no	HepG2	1
A20	210	0.378536358804083	0.010043541530459	TNF_no_HepG2_1	TNF	no	HepG2	1
A20	230	0.40325771882405	0.009837337695424	TNF_no_HepG2_1	TNF	no	HepG2	1
A20	250	0.465322365010357	0.009345135537191	TNF_no_HepG2_1	TNF	no	HepG2	1
A20	270	0.491082197083428	0.009151185892702	TNF_no_HepG2_1	TNF	no	HepG2	1
A20	290	0.519877340328613	0.008941305715178	TNF_no_HepG2_1	TNF	no	HepG2	1
A20	310	0.566542710441517	0.008616212809958	TNF_no_HepG2_1	TNF	no	HepG2	1
A20	340	0.593825889894364	0.008434490001131	TNF_no_HepG2_1	TNF	no	HepG2	1
IP:IkBa | IB:pNFkB	0	-0.093777919287081	0.379966373354343	TNF_no_HepG2_1	TNF	no	HepG2	1
IP:IkBa | IB:pNFkB	2	-0.64520780135223	0.353284065311167	TNF_no_HepG2_1	TNF	no	HepG2	1
IP:IkBa | IB:pNFkB	5	0.697494599220492	0.277505225857011	TNF_no_HepG2_1	TNF	no	HepG2	1
IP:IkBa | IB:pNFkB	7	0.588435310479672	0.331676233860816	TNF_no_HepG2_1	TNF	no	HepG2	1
IP:IkBa | IB:pNFkB	10	-0.591546845248506	0.292791760571818	TNF_no_HepG2_1	TNF	no	HepG2	1
IP:IkBa | IB:pNFkB	12	-1.53528635360383	0.377621242019585	TNF_no_HepG2_1	TNF	no	HepG2	1
IP:IkBa | IB:pNFkB	15	-1.31343542309408	0.385968631558003	TNF_no_HepG2_1	TNF	no	HepG2	1
IP:IkBa | IB:pNFkB	20	-1.2815831192492	0.417350533969405	TNF_no_HepG2_1	TNF	no	HepG2	1
IP:IkBa | IB:pNFkB	30	-0.187046963619257	0.349278079042838	TNF_no_HepG2_1	TNF	no	HepG2	1
IP:IkBa | IB:IkBa	0	0.513801073962495	0.232958558497201	TNF_no_HepG2_1	TNF	no	HepG2	1
IP:IkBa | IB:IkBa	2	0.646552617104109	0.21637712311768	TNF_no_HepG2_1	TNF	no	HepG2	1
IP:IkBa | IB:IkBa	5	0.428747857244178	0.2174713099321	TNF_no_HepG2_1	TNF	no	HepG2	1
IP:IkBa | IB:IkBa	7	-0.383744299185357	0.232621552007331	TNF_no_HepG2_1	TNF	no	HepG2	1
IP:IkBa | IB:IkBa	10	-0.076840815822103	0.234190905639737	TNF_no_HepG2_1	TNF	no	HepG2	1
IP:IkBa | IB:IkBa	12	-1.05625805277188	0.228848506564586	TNF_no_HepG2_1	TNF	no	HepG2	1
IP:IkBa | IB:IkBa	15	-1.18277978937958	0.230803724312467	TNF_no_HepG2_1	TNF	no	HepG2	1
IP:IkBa | IB:IkBa	20	-1.87210784829147	0.246326072080473	TNF_no_HepG2_1	TNF	no	HepG2	1
IP:IkBa | IB:IkBa	30	-0.953460620338946	0.247540655544238	TNF_no_HepG2_1	TNF	no	HepG2	1
IP:IkBa | IB:NFkB and \\IP:NFkB | IB:IkBa	0	0.275120562709234	0.188526506752216	TNF_no_HepG2_1	TNF	no	HepG2	1
IP:IkBa | IB:NFkB and \\IP:NFkB | IB:IkBa	2	0.380868798733498	0.239997155061672	TNF_no_HepG2_1	TNF	no	HepG2	1
IP:IkBa | IB:NFkB and \\IP:NFkB | IB:IkBa	5	0.519063379091559	0.18483177511655	TNF_no_HepG2_1	TNF	no	HepG2	1
IP:IkBa | IB:NFkB and \\IP:NFkB | IB:IkBa	7	-0.065268867047576	0.216121110115541	TNF_no_HepG2_1	TNF	no	HepG2	1
IP:IkBa | IB:NFkB and \\IP:NFkB | IB:IkBa	10	-0.579943239029963	0.210778120543489	TNF_no_HepG2_1	TNF	no	HepG2	1
IP:IkBa | IB:NFkB and \\IP:NFkB | IB:IkBa	12	-0.884822545820066	0.26655732323956	TNF_no_HepG2_1	TNF	no	HepG2	1
IP:IkBa | IB:NFkB and \\IP:NFkB | IB:IkBa	15	-0.96796089006024	0.231579076544153	TNF_no_HepG2_1	TNF	no	HepG2	1
IP:IkBa | IB:NFkB and \\IP:NFkB | IB:IkBa	20	-0.813430372310266	0.245778106969251	TNF_no_HepG2_1	TNF	no	HepG2	1
IP:IkBa | IB:NFkB and \\IP:NFkB | IB:IkBa	30	-0.760927771729068	0.199274167156388	TNF_no_HepG2_1	TNF	no	HepG2	1
IP:NFkB | IB:pIkBa	0	-1.15866122209416	0.223518472188913	TNF_no_HepG2_1	TNF	no	HepG2	1
IP:NFkB | IB:pIkBa	2	-1.85915720084511	0.26559253564635	TNF_no_HepG2_1	TNF	no	HepG2	1
IP:NFkB | IB:pIkBa	5	0.785401174853325	0.191821451809205	TNF_no_HepG2_1	TNF	no	HepG2	1
IP:NFkB | IB:pIkBa	7	1.21343496465494	0.19388084487692	TNF_no_HepG2_1	TNF	no	HepG2	1
IP:NFkB | IB:pIkBa	10	0.776057878110694	0.203749442827808	TNF_no_HepG2_1	TNF	no	HepG2	1
IP:NFkB | IB:pIkBa	12	-0.47014995547178	0.225891332160967	TNF_no_HepG2_1	TNF	no	HepG2	1
IP:NFkB | IB:pIkBa	15	-0.337739960175902	0.238113970773237	TNF_no_HepG2_1	TNF	no	HepG2	1
IP:NFkB | IB:pIkBa	20	-1.37555409333435	0.233754218939756	TNF_no_HepG2_1	TNF	no	HepG2	1
IP:NFkB | IB:pIkBa	30	-1.01487083471899	0.198282188153881	TNF_no_HepG2_1	TNF	no	HepG2	1
IP:NFkB | IB:pNFkB	0	-1.17754455373883	0.207199812052571	TNF_no_HepG2_1	TNF	no	HepG2	1
IP:NFkB | IB:pNFkB	2	-0.713232658708621	0.271458452299101	TNF_no_HepG2_1	TNF	no	HepG2	1
IP:NFkB | IB:pNFkB	5	0.57422040772723	0.217296753166224	TNF_no_HepG2_1	TNF	no	HepG2	1
IP:NFkB | IB:pNFkB	7	0.407536134941959	0.226943611277179	TNF_no_HepG2_1	TNF	no	HepG2	1
IP:NFkB | IB:pNFkB	10	-0.033568362925962	0.201572273138731	TNF_no_HepG2_1	TNF	no	HepG2	1
IP:NFkB | IB:pNFkB	12	0.515595195373719	0.231129521395707	TNF_no_HepG2_1	TNF	no	HepG2	1
IP:NFkB | IB:pNFkB	15	0.26545910952522	0.226297296120089	TNF_no_HepG2_1	TNF	no	HepG2	1
IP:NFkB | IB:pNFkB	20	-0.026157789220357	0.228520281948273	TNF_no_HepG2_1	TNF	no	HepG2	1
IP:NFkB | IB:pNFkB	30	-0.01152910107248	0.200078139170681	TNF_no_HepG2_1	TNF	no	HepG2	1
IP:NFkB | IB:NFkB	0	0.16468176785688	0.183693162780751	TNF_no_HepG2_1	TNF	no	HepG2	1
IP:NFkB | IB:NFkB	2	-0.13090350871048	0.253136084645793	TNF_no_HepG2_1	TNF	no	HepG2	1
IP:NFkB | IB:NFkB	5	0.150974642509346	0.189830891895891	TNF_no_HepG2_1	TNF	no	HepG2	1
IP:NFkB | IB:NFkB	7	0.008167754704772	0.252311873709794	TNF_no_HepG2_1	TNF	no	HepG2	1
IP:NFkB | IB:NFkB	10	-0.13467009760327	0.216934854202651	TNF_no_HepG2_1	TNF	no	HepG2	1
IP:NFkB | IB:NFkB	12	0.143169981562539	0.259866749364615	TNF_no_HepG2_1	TNF	no	HepG2	1
IP:NFkB | IB:NFkB	15	-0.199250748102255	0.254483277148347	TNF_no_HepG2_1	TNF	no	HepG2	1
IP:NFkB | IB:NFkB	20	-0.240655393510383	0.255680767184782	TNF_no_HepG2_1	TNF	no	HepG2	1
IP:NFkB | IB:NFkB	30	0.203834552753065	0.179939648265887	TNF_no_HepG2_1	TNF	no	HepG2	1
NFkB/IkBa ratio	0	-0.22314355131421	0.3	TNF_no_HepG2_1	TNF	no	HepG2	1
IkBa	0	0.151196300067278	0.154904309029369	no_no_HepG2_1	no	no	HepG2	1
IkBa	5	0.385208849890387	0.138244128263403	no_no_HepG2_1	no	no	HepG2	1
IkBa	10	0.256406109529641	0.189114638175532	no_no_HepG2_1	no	no	HepG2	1
IkBa	15	0.039449346957389	0.156241991623764	no_no_HepG2_1	no	no	HepG2	1
IkBa	20	0.315933647959189	0.188869218148591	no_no_HepG2_1	no	no	HepG2	1
IkBa	25	0.230575542202752	0.266301943245048	no_no_HepG2_1	no	no	HepG2	1
IkBa	30	0.212287371725443	0.135087614011364	no_no_HepG2_1	no	no	HepG2	1
IkBa	40	0.027607708782008	0.267438267661621	no_no_HepG2_1	no	no	HepG2	1
IkBa	50	0.151260137305756	0.266774215791608	no_no_HepG2_1	no	no	HepG2	1
IkBa	60	0.276832677613894	0.194599345859635	no_no_HepG2_1	no	no	HepG2	1
IkBa	90	0.538362263915108	0.264058264708658	no_no_HepG2_1	no	no	HepG2	1
IkBa	2	0.286631642552796	0.267933421856125	no_no_HepG2_1	no	no	HepG2	1
IkBa	70	0.181646534171625	0.190098935583088	no_no_HepG2_1	no	no	HepG2	1
pIkBa	0	-0.896502279290791	0.390357993658522	no_no_HepG2_1	no	no	HepG2	1
pIkBa	5	-0.961498074877927	0.390583841333102	no_no_HepG2_1	no	no	HepG2	1
pIkBa	10	-1.54250070520474	0.392062612451603	no_no_HepG2_1	no	no	HepG2	1
pIkBa	15	-1.21751866642074	0.391342523471055	no_no_HepG2_1	no	no	HepG2	1
pIkBa	20	-1.2100838525259	0.391323137788026	no_no_HepG2_1	no	no	HepG2	1
pIkBa	25	-0.727027871267596	0.389694423469539	no_no_HepG2_1	no	no	HepG2	1
pIkBa	30	-1.43175239904335	0.391843140399495	no_no_HepG2_1	no	no	HepG2	1
pIkBa	40	-1.23870129754505	0.391396966583753	no_no_HepG2_1	no	no	HepG2	1
pIkBa	50	-1.82785307595287	0.392527430055833	no_no_HepG2_1	no	no	HepG2	1
pIkBa	60	-1.55209414291459	0.392080499262088	no_no_HepG2_1	no	no	HepG2	1
pIkBa	90	-1.17368302809629	0.391226102774557	no_no_HepG2_1	no	no	HepG2	1
pIKK	0	-0.885366634923487	0.27541085450097	no_no_HepG2_1	no	no	HepG2	1
pIKK	5	-0.747677476347876	0.315902978441349	no_no_HepG2_1	no	no	HepG2	1
pIKK	10	-0.770641190317985	0.315171748775984	no_no_HepG2_1	no	no	HepG2	1
pIKK	15	-0.991883985016185	0.273086902686977	no_no_HepG2_1	no	no	HepG2	1
pIKK	20	-1.17251356617466	0.274010041580286	no_no_HepG2_1	no	no	HepG2	1
pIKK	30	-0.941244549926733	0.272394779481667	no_no_HepG2_1	no	no	HepG2	1
pIKK	60	-1.55415583008953	0.310357132035155	no_no_HepG2_1	no	no	HepG2	1
pIKK	90	-1.03271067138509	0.319632020220002	no_no_HepG2_1	no	no	HepG2	1
pIKK	120	-0.422238238672134	0.380309756831572	no_no_HepG2_1	no	no	HepG2	1
pIKK	180	-1.14881972777496	0.382791836405039	no_no_HepG2_1	no	no	HepG2	1
pIKK	240	-1.41205881746448	0.383327599862987	no_no_HepG2_1	no	no	HepG2	1
pIKK	25	-1.32198679320745	0.381757310981054	no_no_HepG2_1	no	no	HepG2	1
pIKK	40	-2.64240537846677	0.383186482701185	no_no_HepG2_1	no	no	HepG2	1
pIKK	50	-0.254201657308116	0.378009884049934	no_no_HepG2_1	no	no	HepG2	1
pNFkB	0	-1.39328726464124	0.244352095119247	no_no_HepG2_1	no	no	HepG2	1
pNFkB	5	-0.623368389350278	0.330338293232388	no_no_HepG2_1	no	no	HepG2	1
pNFkB	10	-1.27593129106421	0.248819819439597	no_no_HepG2_1	no	no	HepG2	1
pNFkB	15	-1.39106267897104	0.332392264997613	no_no_HepG2_1	no	no	HepG2	1
pNFkB	20	-1.2639805369992	0.282685532467673	no_no_HepG2_1	no	no	HepG2	1
pNFkB	30	-1.58220565427161	0.245634660493347	no_no_HepG2_1	no	no	HepG2	1
pNFkB	60	-0.885556231177813	0.261031387265558	no_no_HepG2_1	no	no	HepG2	1
pNFkB	90	-1.57361153206912	0.33268799512148	no_no_HepG2_1	no	no	HepG2	1
pNFkB	120	-1.13579760732749	0.243893001354897	no_no_HepG2_1	no	no	HepG2	1
pNFkB	180	-2.55987887522894	0.333612200809121	no_no_HepG2_1	no	no	HepG2	1
pNFkB	240	-1.00029095365345	0.24600845036426	no_no_HepG2_1	no	no	HepG2	1
pNFkB	360	-0.825424320234848	0.339449558127279	no_no_HepG2_1	no	no	HepG2	1
nuclear NFkB	0	0.032801441950108	0.029064838969345	no_no_HepG2_1	no	no	HepG2	1
nuclear NFkB	6	0.039735415061715	0.028865577230398	no_no_HepG2_1	no	no	HepG2	1
nuclear NFkB	12	0.015313245329915	0.029573625416072	no_no_HepG2_1	no	no	HepG2	1
nuclear NFkB	18	-0.007721520412396	0.03025760620414	no_no_HepG2_1	no	no	HepG2	1
nuclear NFkB	30	-0.046610025176151	0.031448963456154	no_no_HepG2_1	no	no	HepG2	1
nuclear NFkB	36	-0.040318265068056	0.031253037071592	no_no_HepG2_1	no	no	HepG2	1
nuclear NFkB	42	-0.049217268874001	0.031530517662932	no_no_HepG2_1	no	no	HepG2	1
nuclear NFkB	54	-0.048512789526721	0.031508460632888	no_no_HepG2_1	no	no	HepG2	1
nuclear NFkB	60	-0.053204043391099	0.031655638210876	no_no_HepG2_1	no	no	HepG2	1
nuclear NFkB	72	-0.046234700002022	0.031437240841423	no_no_HepG2_1	no	no	HepG2	1
nuclear NFkB	84	-0.04041677042928	0.031256094988297	no_no_HepG2_1	no	no	HepG2	1
nuclear NFkB	96	-0.041973535957247	0.031304462274679	no_no_HepG2_1	no	no	HepG2	1
nuclear NFkB	108	-0.061328856003297	0.031912186379602	no_no_HepG2_1	no	no	HepG2	1
nuclear NFkB	126	-0.049931469093631	0.031552895217266	no_no_HepG2_1	no	no	HepG2	1
nuclear NFkB	138	-0.061455441667152	0.031916199861125	no_no_HepG2_1	no	no	HepG2	1
nuclear NFkB	156	-0.058154933669463	0.031811717198321	no_no_HepG2_1	no	no	HepG2	1
nuclear NFkB	174	-0.067894188583787	0.03212103037225	no_no_HepG2_1	no	no	HepG2	1
nuclear NFkB	186	-0.076104716948179	0.03238415772506	no_no_HepG2_1	no	no	HepG2	1
nuclear NFkB	210	-0.06595015161884	0.032059046334963	no_no_HepG2_1	no	no	HepG2	1
nuclear NFkB	228	-0.070636470995422	0.032208672143121	no_no_HepG2_1	no	no	HepG2	1
nuclear NFkB	246	-0.090555232395783	0.032852574645694	no_no_HepG2_1	no	no	HepG2	1
nuclear NFkB	270	-0.091176883168253	0.032872878771876	no_no_HepG2_1	no	no	HepG2	1
nuclear NFkB	288	-0.111103975240388	0.033530504360226	no_no_HepG2_1	no	no	HepG2	1
nuclear NFkB	312	-0.123585186535183	0.033949168723334	no_no_HepG2_1	no	no	HepG2	1
nuclear NFkB	336	-0.116691806795005	0.033717290379271	no_no_HepG2_1	no	no	HepG2	1
nuclear NFkB	360	-0.093594288709505	0.032951956250406	no_no_HepG2_1	no	no	HepG2	1
cytoplasmic NFkB	0	0.146477862241863	0.015999439086707	no_no_HepG2_1	no	no	HepG2	1
cytoplasmic NFkB	6	0.139538391561696	0.016109650868844	no_no_HepG2_1	no	no	HepG2	1
cytoplasmic NFkB	12	0.109369834241324	0.0165978709398	no_no_HepG2_1	no	no	HepG2	1
cytoplasmic NFkB	18	0.099245482562452	0.01676507702387	no_no_HepG2_1	no	no	HepG2	1
cytoplasmic NFkB	30	0.086167184412734	0.016983614165527	no_no_HepG2_1	no	no	HepG2	1
cytoplasmic NFkB	36	0.083811995224226	0.017023276809181	no_no_HepG2_1	no	no	HepG2	1
cytoplasmic NFkB	42	0.084534500177766	0.017011099272413	no_no_HepG2_1	no	no	HepG2	1
cytoplasmic NFkB	54	0.079442053027142	0.017097118896271	no_no_HepG2_1	no	no	HepG2	1
cytoplasmic NFkB	60	0.069084540404569	0.017273444204559	no_no_HepG2_1	no	no	HepG2	1
cytoplasmic NFkB	72	0.064478989521569	0.017352442696864	no_no_HepG2_1	no	no	HepG2	1
cytoplasmic NFkB	84	0.053520313905539	0.017541898414099	no_no_HepG2_1	no	no	HepG2	1
cytoplasmic NFkB	96	0.041499952515847	0.017752132121681	no_no_HepG2_1	no	no	HepG2	1
cytoplasmic NFkB	108	0.036110798949095	0.017847218039939	no_no_HepG2_1	no	no	HepG2	1
cytoplasmic NFkB	126	0.028369827554424	0.017984707236793	no_no_HepG2_1	no	no	HepG2	1
cytoplasmic NFkB	138	0.024393421632381	0.018055751588505	no_no_HepG2_1	no	no	HepG2	1
cytoplasmic NFkB	156	0.018344341757875	0.018164374927089	no_no_HepG2_1	no	no	HepG2	1
cytoplasmic NFkB	174	0.013785556532328	0.018246676003722	no_no_HepG2_1	no	no	HepG2	1
cytoplasmic NFkB	186	0.017539312174347	0.01817888099684	no_no_HepG2_1	no	no	HepG2	1
cytoplasmic NFkB	210	0.012537349553628	0.018269276208126	no_no_HepG2_1	no	no	HepG2	1
cytoplasmic NFkB	228	0.001917434495201	0.018462717860344	no_no_HepG2_1	no	no	HepG2	1
cytoplasmic NFkB	246	-0.003622348999657	0.018564449687781	no_no_HepG2_1	no	no	HepG2	1
cytoplasmic NFkB	270	-0.016121454771586	0.018796079346803	no_no_HepG2_1	no	no	HepG2	1
cytoplasmic NFkB	288	-0.019582954401083	0.018860744376588	no_no_HepG2_1	no	no	HepG2	1
cytoplasmic NFkB	312	-0.019615954214183	0.018861361898741	no_no_HepG2_1	no	no	HepG2	1
cytoplasmic NFkB	336	-0.02470516202565	0.018956848370304	no_no_HepG2_1	no	no	HepG2	1
cytoplasmic NFkB	360	-0.037369524916546	0.01919660033643	no_no_HepG2_1	no	no	HepG2	1
A20	40	-0.406317664976972	0.028854829867134	no_no_HepG2_1	no	no	HepG2	1
A20	50	-0.4315479624716	0.029578207177468	no_no_HepG2_1	no	no	HepG2	1
A20	60	-0.382836256156622	0.028198101117879	no_no_HepG2_1	no	no	HepG2	1
A20	70	-0.370173210703057	0.02785041436927	no_no_HepG2_1	no	no	HepG2	1
A20	80	-0.411791649208316	0.029010198686037	no_no_HepG2_1	no	no	HepG2	1
A20	100	-0.401947963999418	0.028731424365152	no_no_HepG2_1	no	no	HepG2	1
A20	110	-0.390186698832536	0.028401990473169	no_no_HepG2_1	no	no	HepG2	1
A20	120	-0.408223798506277	0.028908833460121	no_no_HepG2_1	no	no	HepG2	1
A20	140	-0.350965959662574	0.027331547464098	no_no_HepG2_1	no	no	HepG2	1
A20	150	-0.322098295767695	0.026570610805651	no_no_HepG2_1	no	no	HepG2	1
A20	170	-0.353835281136998	0.027408414653608	no_no_HepG2_1	no	no	HepG2	1
A20	190	-0.334909040930587	0.026905526528991	no_no_HepG2_1	no	no	HepG2	1
A20	210	-0.332189371403567	0.026834057972638	no_no_HepG2_1	no	no	HepG2	1
A20	230	-0.337578562142612	0.026975870562519	no_no_HepG2_1	no	no	HepG2	1
A20	250	-0.287686585633213	0.025692400877045	no_no_HepG2_1	no	no	HepG2	1
A20	270	-0.288979302608774	0.025724835842011	no_no_HepG2_1	no	no	HepG2	1
A20	290	-0.266243176425946	0.025160594246198	no_no_HepG2_1	no	no	HepG2	1
A20	310	-0.232864117614429	0.024355696416048	no_no_HepG2_1	no	no	HepG2	1
A20	340	-0.239924139518601	0.024523649547691	no_no_HepG2_1	no	no	HepG2	1
IkBa	0	0.247452487975329	0.12730341060191	TNF_DCF_HepG2_1	TNF	DCF	HepG2	1
IkBa	5	-0.338376065635076	0.128094806266534	TNF_DCF_HepG2_1	TNF	DCF	HepG2	1
IkBa	10	-0.965988027277263	0.140650603146223	TNF_DCF_HepG2_1	TNF	DCF	HepG2	1
IkBa	15	-1.49809680362066	0.137341724749788	TNF_DCF_HepG2_1	TNF	DCF	HepG2	1
IkBa	20	-1.83773965322896	0.129952141755414	TNF_DCF_HepG2_1	TNF	DCF	HepG2	1
IkBa	30	-1.5305078666336	0.13042720062443	TNF_DCF_HepG2_1	TNF	DCF	HepG2	1
IkBa	40	-0.481845889768729	0.172049593324656	TNF_DCF_HepG2_1	TNF	DCF	HepG2	1
IkBa	50	0.317749726092544	0.167371870211504	TNF_DCF_HepG2_1	TNF	DCF	HepG2	1
IkBa	60	0.559520983646859	0.193345503316011	TNF_DCF_HepG2_1	TNF	DCF	HepG2	1
IkBa	70	0.786218343972263	0.161239738052993	TNF_DCF_HepG2_1	TNF	DCF	HepG2	1
IkBa	90	0.67704902583587	0.193057286462289	TNF_DCF_HepG2_1	TNF	DCF	HepG2	1
IkBa	2	0.122749727863518	0.201034139524587	TNF_DCF_HepG2_1	TNF	DCF	HepG2	1
IkBa	7	-0.753792524194543	0.231806729468939	TNF_DCF_HepG2_1	TNF	DCF	HepG2	1
IkBa	12	-1.11883272377171	0.1996737341388	TNF_DCF_HepG2_1	TNF	DCF	HepG2	1
pIkBa	0	-1.71412304049264	0.22020601359279	TNF_DCF_HepG2_1	TNF	DCF	HepG2	1
pIkBa	5	0.855646139109624	0.186937355341107	TNF_DCF_HepG2_1	TNF	DCF	HepG2	1
pIkBa	10	0.76232833833451	0.190357235675122	TNF_DCF_HepG2_1	TNF	DCF	HepG2	1
pIkBa	15	-0.569592712485636	0.206523397187134	TNF_DCF_HepG2_1	TNF	DCF	HepG2	1
pIkBa	20	-1.51731004965965	0.201275823014381	TNF_DCF_HepG2_1	TNF	DCF	HepG2	1
pIkBa	30	-1.39017934962006	0.218047039348669	TNF_DCF_HepG2_1	TNF	DCF	HepG2	1
pIkBa	40	0.15484887320755	0.277633805729051	TNF_DCF_HepG2_1	TNF	DCF	HepG2	1
pIkBa	50	0.355091030932591	0.318111485407225	TNF_DCF_HepG2_1	TNF	DCF	HepG2	1
pIkBa	60	-0.239979340038799	0.271613703104421	TNF_DCF_HepG2_1	TNF	DCF	HepG2	1
pIkBa	70	0.11086823567797	0.266924217477277	TNF_DCF_HepG2_1	TNF	DCF	HepG2	1
pIkBa	90	-0.239056824849448	0.267916275964786	TNF_DCF_HepG2_1	TNF	DCF	HepG2	1
pIkBa	2	-1.77412485909904	0.285074474376099	TNF_DCF_HepG2_1	TNF	DCF	HepG2	1
pIkBa	7	1.07077128583569	0.262299924343603	TNF_DCF_HepG2_1	TNF	DCF	HepG2	1
pIkBa	12	0.441905363341337	0.272263901958076	TNF_DCF_HepG2_1	TNF	DCF	HepG2	1
pIKK	0	-0.537668536904159	0.17062702963121	TNF_DCF_HepG2_1	TNF	DCF	HepG2	1
pIKK	5	0.259987119709289	0.154580493650827	TNF_DCF_HepG2_1	TNF	DCF	HepG2	1
pIKK	10	0.730305270235277	0.165254445686675	TNF_DCF_HepG2_1	TNF	DCF	HepG2	1
pIKK	15	0.77042788256108	0.167378650480389	TNF_DCF_HepG2_1	TNF	DCF	HepG2	1
pIKK	20	0.368946198244679	0.175888708563282	TNF_DCF_HepG2_1	TNF	DCF	HepG2	1
pIKK	30	0.035160808753333	0.153603201617197	TNF_DCF_HepG2_1	TNF	DCF	HepG2	1
pIKK	40	0.120008043056214	0.215946436791983	TNF_DCF_HepG2_1	TNF	DCF	HepG2	1
pIKK	50	-0.064691367165335	0.223784849573754	TNF_DCF_HepG2_1	TNF	DCF	HepG2	1
pIKK	60	-0.36448963470452	0.269467809844042	TNF_DCF_HepG2_1	TNF	DCF	HepG2	1
pIKK	70	-0.222214534636062	0.273702997133	TNF_DCF_HepG2_1	TNF	DCF	HepG2	1
pIKK	90	-0.858037566981163	0.267381844550976	TNF_DCF_HepG2_1	TNF	DCF	HepG2	1
pIKK	2	-0.197100495988588	0.228274310432068	TNF_DCF_HepG2_1	TNF	DCF	HepG2	1
pIKK	7	0.33198718296025	0.228960907700026	TNF_DCF_HepG2_1	TNF	DCF	HepG2	1
pIKK	12	0.74240034652147	0.22092745860486	TNF_DCF_HepG2_1	TNF	DCF	HepG2	1
pIKK	120	-0.407164719368114	0.378719291505236	TNF_DCF_HepG2_1	TNF	DCF	HepG2	1
pIKK	240	0.170566630631608	0.374855604836269	TNF_DCF_HepG2_1	TNF	DCF	HepG2	1
pNFkB	0	-1.01434248349734	0.174442147038584	TNF_DCF_HepG2_1	TNF	DCF	HepG2	1
pNFkB	5	0.63778968103702	0.163821944491556	TNF_DCF_HepG2_1	TNF	DCF	HepG2	1
pNFkB	10	0.75382548083415	0.165556380117954	TNF_DCF_HepG2_1	TNF	DCF	HepG2	1
pNFkB	15	0.407122681245715	0.165879647610091	TNF_DCF_HepG2_1	TNF	DCF	HepG2	1
pNFkB	20	-0.08371317290078	0.164862215714028	TNF_DCF_HepG2_1	TNF	DCF	HepG2	1
pNFkB	30	-0.540789589906501	0.168389065164049	TNF_DCF_HepG2_1	TNF	DCF	HepG2	1
pNFkB	40	-0.606133069959674	0.321134946893879	TNF_DCF_HepG2_1	TNF	DCF	HepG2	1
pNFkB	50	-0.030502200869395	0.317988257243359	TNF_DCF_HepG2_1	TNF	DCF	HepG2	1
pNFkB	60	0.194571302285389	0.316159162991439	TNF_DCF_HepG2_1	TNF	DCF	HepG2	1
pNFkB	70	-0.465468663823156	0.320526672866752	TNF_DCF_HepG2_1	TNF	DCF	HepG2	1
pNFkB	90	0.540936186660647	0.312369071313044	TNF_DCF_HepG2_1	TNF	DCF	HepG2	1
pNFkB	2	-1.23864520820795	0.200352903853644	TNF_DCF_HepG2_1	TNF	DCF	HepG2	1
pNFkB	12	0.416059042216809	0.191295274166594	TNF_DCF_HepG2_1	TNF	DCF	HepG2	1
nuclear NFkB	0	-0.044946552276943	0.031397041856383	TNF_DCF_HepG2_1	TNF	DCF	HepG2	1
nuclear NFkB	6	-0.014288403934154	0.030455524224963	TNF_DCF_HepG2_1	TNF	DCF	HepG2	1
nuclear NFkB	12	0.295479603697177	0.022410871072725	TNF_DCF_HepG2_1	TNF	DCF	HepG2	1
nuclear NFkB	18	0.56683295802523	0.017165654690697	TNF_DCF_HepG2_1	TNF	DCF	HepG2	1
nuclear NFkB	30	0.664706642377883	0.015602873705338	TNF_DCF_HepG2_1	TNF	DCF	HepG2	1
nuclear NFkB	36	0.616359419109346	0.016355269087267	TNF_DCF_HepG2_1	TNF	DCF	HepG2	1
nuclear NFkB	42	0.529319281663739	0.017807384152726	TNF_DCF_HepG2_1	TNF	DCF	HepG2	1
nuclear NFkB	54	0.293713052440068	0.022449975206556	TNF_DCF_HepG2_1	TNF	DCF	HepG2	1
nuclear NFkB	60	0.16609220090775	0.025468225816725	TNF_DCF_HepG2_1	TNF	DCF	HepG2	1
nuclear NFkB	72	0.008863482360747	0.029763543625736	TNF_DCF_HepG2_1	TNF	DCF	HepG2	1
nuclear NFkB	84	-0.058563918540819	0.031824645458643	TNF_DCF_HepG2_1	TNF	DCF	HepG2	1
nuclear NFkB	96	-0.095422321638865	0.03301188199781	TNF_DCF_HepG2_1	TNF	DCF	HepG2	1
nuclear NFkB	108	-0.111015958844357	0.033527570553562	TNF_DCF_HepG2_1	TNF	DCF	HepG2	1
nuclear NFkB	126	-0.09580357889677	0.033024393867022	TNF_DCF_HepG2_1	TNF	DCF	HepG2	1
nuclear NFkB	138	-0.063701479115075	0.031987500523799	TNF_DCF_HepG2_1	TNF	DCF	HepG2	1
nuclear NFkB	156	0.021208310986989	0.029401116831211	TNF_DCF_HepG2_1	TNF	DCF	HepG2	1
nuclear NFkB	174	0.082307223889869	0.027672253348932	TNF_DCF_HepG2_1	TNF	DCF	HepG2	1
nuclear NFkB	186	0.094805628077848	0.027331530505175	TNF_DCF_HepG2_1	TNF	DCF	HepG2	1
nuclear NFkB	210	0.04305508947101	0.028770671727148	TNF_DCF_HepG2_1	TNF	DCF	HepG2	1
nuclear NFkB	228	-0.025683675175372	0.030802085963156	TNF_DCF_HepG2_1	TNF	DCF	HepG2	1
nuclear NFkB	246	-0.068141721198613	0.032128931500771	TNF_DCF_HepG2_1	TNF	DCF	HepG2	1
nuclear NFkB	270	-0.08125000007694	0.032550163062699	TNF_DCF_HepG2_1	TNF	DCF	HepG2	1
nuclear NFkB	288	-0.065725609556776	0.032051894920796	TNF_DCF_HepG2_1	TNF	DCF	HepG2	1
nuclear NFkB	312	-0.049088043488094	0.031526470618537	TNF_DCF_HepG2_1	TNF	DCF	HepG2	1
nuclear NFkB	336	-0.033910959616359	0.031054783919563	TNF_DCF_HepG2_1	TNF	DCF	HepG2	1
nuclear NFkB	360	-0.041143752248539	0.031278672334674	TNF_DCF_HepG2_1	TNF	DCF	HepG2	1
cytoplasmic NFkB	0	0.109791741197012	0.016590940030932	TNF_DCF_HepG2_1	TNF	DCF	HepG2	1
cytoplasmic NFkB	6	0.116197840554157	0.016486066278672	TNF_DCF_HepG2_1	TNF	DCF	HepG2	1
cytoplasmic NFkB	12	-0.017450745172482	0.018820885410781	TNF_DCF_HepG2_1	TNF	DCF	HepG2	1
cytoplasmic NFkB	18	-0.129910568269797	0.021044487595016	TNF_DCF_HepG2_1	TNF	DCF	HepG2	1
cytoplasmic NFkB	30	-0.190505097077835	0.022351111136587	TNF_DCF_HepG2_1	TNF	DCF	HepG2	1
cytoplasmic NFkB	36	-0.176484939775694	0.022041669444769	TNF_DCF_HepG2_1	TNF	DCF	HepG2	1
cytoplasmic NFkB	42	-0.143349538255168	0.021327443182624	TNF_DCF_HepG2_1	TNF	DCF	HepG2	1
cytoplasmic NFkB	54	-0.057849192774219	0.019590837329603	TNF_DCF_HepG2_1	TNF	DCF	HepG2	1
cytoplasmic NFkB	60	-0.025311478977795	0.018968257095454	TNF_DCF_HepG2_1	TNF	DCF	HepG2	1
cytoplasmic NFkB	72	0.011217336520796	0.018293207627333	TNF_DCF_HepG2_1	TNF	DCF	HepG2	1
cytoplasmic NFkB	84	0.018986727731612	0.018152808028782	TNF_DCF_HepG2_1	TNF	DCF	HepG2	1
cytoplasmic NFkB	96	0.022226470844307	0.018094587277175	TNF_DCF_HepG2_1	TNF	DCF	HepG2	1
cytoplasmic NFkB	108	0.018398367317304	0.018163401736386	TNF_DCF_HepG2_1	TNF	DCF	HepG2	1
cytoplasmic NFkB	126	0.009651934862687	0.018321629548872	TNF_DCF_HepG2_1	TNF	DCF	HepG2	1
cytoplasmic NFkB	138	-0.001725217839983	0.018529546930157	TNF_DCF_HepG2_1	TNF	DCF	HepG2	1
cytoplasmic NFkB	156	-0.029838522350304	0.019053660636113	TNF_DCF_HepG2_1	TNF	DCF	HepG2	1
cytoplasmic NFkB	174	-0.050379672331063	0.019446104669187	TNF_DCF_HepG2_1	TNF	DCF	HepG2	1
cytoplasmic NFkB	186	-0.058375944525154	0.019601085089219	TNF_DCF_HepG2_1	TNF	DCF	HepG2	1
cytoplasmic NFkB	210	-0.050456280358211	0.019447583668468	TNF_DCF_HepG2_1	TNF	DCF	HepG2	1
cytoplasmic NFkB	228	-0.043219123006421	0.019308377518997	TNF_DCF_HepG2_1	TNF	DCF	HepG2	1
cytoplasmic NFkB	246	-0.044363724995664	0.019330326209236	TNF_DCF_HepG2_1	TNF	DCF	HepG2	1
cytoplasmic NFkB	270	-0.049611701165838	0.019431285758681	TNF_DCF_HepG2_1	TNF	DCF	HepG2	1
cytoplasmic NFkB	288	-0.059793982819546	0.019628699412405	TNF_DCF_HepG2_1	TNF	DCF	HepG2	1
cytoplasmic NFkB	312	-0.069916203475084	0.019826965607407	TNF_DCF_HepG2_1	TNF	DCF	HepG2	1
cytoplasmic NFkB	336	-0.079260840760193	0.020011803830115	TNF_DCF_HepG2_1	TNF	DCF	HepG2	1
cytoplasmic NFkB	360	-0.083623759943565	0.02009870047856	TNF_DCF_HepG2_1	TNF	DCF	HepG2	1
A20	40	-0.452509202354495	0.021535296824136	TNF_DCF_HepG2_1	TNF	DCF	HepG2	1
A20	50	-0.458414767629105	0.021658492782729	TNF_DCF_HepG2_1	TNF	DCF	HepG2	1
A20	60	-0.367460066265822	0.0198421998051	TNF_DCF_HepG2_1	TNF	DCF	HepG2	1
A20	70	-0.294773366652425	0.018509279832725	TNF_DCF_HepG2_1	TNF	DCF	HepG2	1
A20	80	-0.235303882109892	0.017491648032553	TNF_DCF_HepG2_1	TNF	DCF	HepG2	1
A20	100	-0.067907581996559	0.014947576018458	TNF_DCF_HepG2_1	TNF	DCF	HepG2	1
A20	110	-0.012754380149125	0.014204036659941	TNF_DCF_HepG2_1	TNF	DCF	HepG2	1
A20	120	0.031142893740409	0.013643045845522	TNF_DCF_HepG2_1	TNF	DCF	HepG2	1
A20	140	0.13865576028055	0.012377179843464	TNF_DCF_HepG2_1	TNF	DCF	HepG2	1
A20	150	0.164091862528985	0.012098941030252	TNF_DCF_HepG2_1	TNF	DCF	HepG2	1
A20	170	0.15063836401473	0.012245129842796	TNF_DCF_HepG2_1	TNF	DCF	HepG2	1
A20	190	0.20555977207827	0.01166183904549	TNF_DCF_HepG2_1	TNF	DCF	HepG2	1
A20	210	0.223573254641289	0.011478171563033	TNF_DCF_HepG2_1	TNF	DCF	HepG2	1
A20	230	0.239395831864267	0.011319872884595	TNF_DCF_HepG2_1	TNF	DCF	HepG2	1
A20	250	0.264688813579907	0.011072605082989	TNF_DCF_HepG2_1	TNF	DCF	HepG2	1
A20	270	0.274036369458275	0.010982993389917	TNF_DCF_HepG2_1	TNF	DCF	HepG2	1
A20	290	0.291269530090516	0.010820250992257	TNF_DCF_HepG2_1	TNF	DCF	HepG2	1
A20	310	0.323756781954549	0.010521993543249	TNF_DCF_HepG2_1	TNF	DCF	HepG2	1
A20	340	0.30081547506972	0.010731464082521	TNF_DCF_HepG2_1	TNF	DCF	HepG2	1
IP:IkBa | IB:pNFkB	0	-0.130633866552744	0.315945081042764	TNF_DCF_HepG2_1	TNF	DCF	HepG2	1
IP:IkBa | IB:pNFkB	2	0.502559101100814	0.373202970172859	TNF_DCF_HepG2_1	TNF	DCF	HepG2	1
IP:IkBa | IB:pNFkB	5	-0.28688151274056	0.291239743874114	TNF_DCF_HepG2_1	TNF	DCF	HepG2	1
IP:IkBa | IB:pNFkB	7	0.483099588722869	0.332085997906448	TNF_DCF_HepG2_1	TNF	DCF	HepG2	1
IP:IkBa | IB:pNFkB	10	0.113220633207935	0.284499004142527	TNF_DCF_HepG2_1	TNF	DCF	HepG2	1
IP:IkBa | IB:pNFkB	12	-1.48570941244175	0.382834807289208	TNF_DCF_HepG2_1	TNF	DCF	HepG2	1
IP:IkBa | IB:pNFkB	15	-0.354378043702071	0.363892078576518	TNF_DCF_HepG2_1	TNF	DCF	HepG2	1
IP:IkBa | IB:pNFkB	20	-1.37719326417213	0.355167361941816	TNF_DCF_HepG2_1	TNF	DCF	HepG2	1
IP:IkBa | IB:pNFkB	30	-0.728379824321746	0.328413086657867	TNF_DCF_HepG2_1	TNF	DCF	HepG2	1
IP:IkBa | IB:IkBa	0	0.051900503209578	0.245653188740864	TNF_DCF_HepG2_1	TNF	DCF	HepG2	1
IP:IkBa | IB:IkBa	2	0.235076091346901	0.231423993126505	TNF_DCF_HepG2_1	TNF	DCF	HepG2	1
IP:IkBa | IB:IkBa	5	0.430164458647476	0.222352709747775	TNF_DCF_HepG2_1	TNF	DCF	HepG2	1
IP:IkBa | IB:IkBa	7	0.241144639664417	0.217362714274684	TNF_DCF_HepG2_1	TNF	DCF	HepG2	1
IP:IkBa | IB:IkBa	10	-0.096402283213041	0.227842793833951	TNF_DCF_HepG2_1	TNF	DCF	HepG2	1
IP:IkBa | IB:IkBa	12	-1.10695901297026	0.258249500526809	TNF_DCF_HepG2_1	TNF	DCF	HepG2	1
IP:IkBa | IB:IkBa	15	-0.954887393010939	0.228043258321272	TNF_DCF_HepG2_1	TNF	DCF	HepG2	1
IP:IkBa | IB:IkBa	20	-1.44753652339098	0.231416820469029	TNF_DCF_HepG2_1	TNF	DCF	HepG2	1
IP:IkBa | IB:IkBa	30	-1.31395408963383	0.229429944509093	TNF_DCF_HepG2_1	TNF	DCF	HepG2	1
IP:IkBa | IB:NFkB and \\IP:NFkB | IB:IkBa	0	0.457531641399621	0.181853478001921	TNF_DCF_HepG2_1	TNF	DCF	HepG2	1
IP:IkBa | IB:NFkB and \\IP:NFkB | IB:IkBa	2	0.701952092843306	0.213689887537591	TNF_DCF_HepG2_1	TNF	DCF	HepG2	1
IP:IkBa | IB:NFkB and \\IP:NFkB | IB:IkBa	5	0.357346793948008	0.176591804992442	TNF_DCF_HepG2_1	TNF	DCF	HepG2	1
IP:IkBa | IB:NFkB and \\IP:NFkB | IB:IkBa	7	0.02783753052235	0.216304007994738	TNF_DCF_HepG2_1	TNF	DCF	HepG2	1
IP:IkBa | IB:NFkB and \\IP:NFkB | IB:IkBa	10	-0.543998022172113	0.199020407305384	TNF_DCF_HepG2_1	TNF	DCF	HepG2	1
IP:IkBa | IB:NFkB and \\IP:NFkB | IB:IkBa	12	-1.06095852284747	0.229346909358677	TNF_DCF_HepG2_1	TNF	DCF	HepG2	1
IP:IkBa | IB:NFkB and \\IP:NFkB | IB:IkBa	15	-0.829082065923926	0.230908783399876	TNF_DCF_HepG2_1	TNF	DCF	HepG2	1
IP:IkBa | IB:NFkB and \\IP:NFkB | IB:IkBa	20	-1.49721684937649	0.229140476409263	TNF_DCF_HepG2_1	TNF	DCF	HepG2	1
IP:IkBa | IB:NFkB and \\IP:NFkB | IB:IkBa	30	-0.404459987352793	0.210842067753583	TNF_DCF_HepG2_1	TNF	DCF	HepG2	1
IP:NFkB | IB:pIkBa	0	-1.24763526617512	0.197768894694876	TNF_DCF_HepG2_1	TNF	DCF	HepG2	1
IP:NFkB | IB:pIkBa	2	-1.25847992064696	0.253325255922177	TNF_DCF_HepG2_1	TNF	DCF	HepG2	1
IP:NFkB | IB:pIkBa	5	-0.585705514523862	0.206001859153947	TNF_DCF_HepG2_1	TNF	DCF	HepG2	1
IP:NFkB | IB:pIkBa	7	0.198603730889933	0.217835294541278	TNF_DCF_HepG2_1	TNF	DCF	HepG2	1
IP:NFkB | IB:pIkBa	10	0.792526483051166	0.183525912313722	TNF_DCF_HepG2_1	TNF	DCF	HepG2	1
IP:NFkB | IB:pIkBa	12	0.116455629129877	0.216083581484199	TNF_DCF_HepG2_1	TNF	DCF	HepG2	1
IP:NFkB | IB:pIkBa	15	-0.18783527238998	0.231467475072404	TNF_DCF_HepG2_1	TNF	DCF	HepG2	1
IP:NFkB | IB:pIkBa	20	-0.716255111131138	0.226981121723032	TNF_DCF_HepG2_1	TNF	DCF	HepG2	1
IP:NFkB | IB:pIkBa	30	-1.83307578350362	0.199900200410445	TNF_DCF_HepG2_1	TNF	DCF	HepG2	1
IP:NFkB | IB:pNFkB	0	-0.771627252284405	0.227768865904097	TNF_DCF_HepG2_1	TNF	DCF	HepG2	1
IP:NFkB | IB:pNFkB	2	-1.00568781961982	0.234492630652487	TNF_DCF_HepG2_1	TNF	DCF	HepG2	1
IP:NFkB | IB:pNFkB	5	-0.228861471540378	0.214596419519827	TNF_DCF_HepG2_1	TNF	DCF	HepG2	1
IP:NFkB | IB:pNFkB	7	-0.197745990015679	0.237389006754815	TNF_DCF_HepG2_1	TNF	DCF	HepG2	1
IP:NFkB | IB:pNFkB	10	0.212536525280301	0.194448199160972	TNF_DCF_HepG2_1	TNF	DCF	HepG2	1
IP:NFkB | IB:pNFkB	12	0.082326312693077	0.227949789690484	TNF_DCF_HepG2_1	TNF	DCF	HepG2	1
IP:NFkB | IB:pNFkB	15	0.227741964647441	0.231447375366037	TNF_DCF_HepG2_1	TNF	DCF	HepG2	1
IP:NFkB | IB:pNFkB	20	0.01330058307071	0.245267617687438	TNF_DCF_HepG2_1	TNF	DCF	HepG2	1
IP:NFkB | IB:pNFkB	30	-0.521635833723221	0.20876053905724	TNF_DCF_HepG2_1	TNF	DCF	HepG2	1
IP:NFkB | IB:NFkB	0	-0.369304033253896	0.188748379702549	TNF_DCF_HepG2_1	TNF	DCF	HepG2	1
IP:NFkB | IB:NFkB	2	0.547352573790847	0.263126779532197	TNF_DCF_HepG2_1	TNF	DCF	HepG2	1
IP:NFkB | IB:NFkB	5	0.012186144650744	0.189395884652491	TNF_DCF_HepG2_1	TNF	DCF	HepG2	1
IP:NFkB | IB:NFkB	7	-0.18158972545948	0.298374152130182	TNF_DCF_HepG2_1	TNF	DCF	HepG2	1
IP:NFkB | IB:NFkB	10	0.236179238085914	0.216125897774661	TNF_DCF_HepG2_1	TNF	DCF	HepG2	1
IP:NFkB | IB:NFkB	12	-0.120298760774918	0.253168754267218	TNF_DCF_HepG2_1	TNF	DCF	HepG2	1
IP:NFkB | IB:NFkB	15	-0.678947068647754	0.264630217504799	TNF_DCF_HepG2_1	TNF	DCF	HepG2	1
IP:NFkB | IB:NFkB	20	-0.698050881995239	0.290140522532991	TNF_DCF_HepG2_1	TNF	DCF	HepG2	1
IP:NFkB | IB:NFkB	30	0.112230792492747	0.207538108238815	TNF_DCF_HepG2_1	TNF	DCF	HepG2	1
IkBa	2	-0.039219476769713	0.269739520913334	no_DCF_HepG2_1	no	DCF	HepG2	1
IkBa	5	0.147471726763042	0.156751677076924	no_DCF_HepG2_1	no	DCF	HepG2	1
IkBa	10	0.062691724885066	0.156048958346236	no_DCF_HepG2_1	no	DCF	HepG2	1
IkBa	20	0.163233039523019	0.155628607212924	no_DCF_HepG2_1	no	DCF	HepG2	1
IkBa	30	-0.040385743593482	0.157936998133905	no_DCF_HepG2_1	no	DCF	HepG2	1
IkBa	60	0.229413013535742	0.268295581631984	no_DCF_HepG2_1	no	DCF	HepG2	1
IkBa	0	0.10090482802171	0.190298819651933	no_DCF_HepG2_1	no	DCF	HepG2	1
IkBa	15	0.072283486365564	0.190284968062448	no_DCF_HepG2_1	no	DCF	HepG2	1
IkBa	40	-0.06484907765853	0.192055866350396	no_DCF_HepG2_1	no	DCF	HepG2	1
IkBa	50	-0.005060187630882	0.19151971141244	no_DCF_HepG2_1	no	DCF	HepG2	1
IkBa	70	-0.121305287984432	0.190937542419323	no_DCF_HepG2_1	no	DCF	HepG2	1
nuclear NFkB	0	0.011394046917519	0.029688882200195	no_DCF_HepG2_1	no	DCF	HepG2	1
nuclear NFkB	6	0.013857540118504	0.02961638194093	no_DCF_HepG2_1	no	DCF	HepG2	1
nuclear NFkB	12	-0.011327209319837	0.030366115317708	no_DCF_HepG2_1	no	DCF	HepG2	1
nuclear NFkB	18	-0.043990424510187	0.031367237811959	no_DCF_HepG2_1	no	DCF	HepG2	1
nuclear NFkB	30	-0.02597224045994	0.03081091370968	no_DCF_HepG2_1	no	DCF	HepG2	1
nuclear NFkB	36	-0.03696458862375	0.031149108837893	no_DCF_HepG2_1	no	DCF	HepG2	1
nuclear NFkB	42	-0.047756474967716	0.031484797763948	no_DCF_HepG2_1	no	DCF	HepG2	1
nuclear NFkB	54	-0.065941675440707	0.032058776439606	no_DCF_HepG2_1	no	DCF	HepG2	1
nuclear NFkB	60	-0.064483227321622	0.032012354898967	no_DCF_HepG2_1	no	DCF	HepG2	1
nuclear NFkB	72	-0.08691400955197	0.032733901062692	no_DCF_HepG2_1	no	DCF	HepG2	1
nuclear NFkB	84	-0.097908620203041	0.033093563983132	no_DCF_HepG2_1	no	DCF	HepG2	1
nuclear NFkB	96	-0.107911271176877	0.03342425119734	no_DCF_HepG2_1	no	DCF	HepG2	1
nuclear NFkB	108	-0.118431889276394	0.033775671444725	no_DCF_HepG2_1	no	DCF	HepG2	1
nuclear NFkB	126	-0.124653282744539	0.033985241203553	no_DCF_HepG2_1	no	DCF	HepG2	1
nuclear NFkB	138	-0.11977439012923	0.033820783071778	no_DCF_HepG2_1	no	DCF	HepG2	1
nuclear NFkB	156	-0.117529998282368	0.033745399850639	no_DCF_HepG2_1	no	DCF	HepG2	1
nuclear NFkB	174	-0.123822154847645	0.033957168567424	no_DCF_HepG2_1	no	DCF	HepG2	1
nuclear NFkB	186	-0.139635099656088	0.0344953222046	no_DCF_HepG2_1	no	DCF	HepG2	1
nuclear NFkB	210	-0.138240792353052	0.034447525800271	no_DCF_HepG2_1	no	DCF	HepG2	1
nuclear NFkB	228	-0.129020798031186	0.034133147795636	no_DCF_HepG2_1	no	DCF	HepG2	1
nuclear NFkB	246	-0.15396655402717	0.034990504818182	no_DCF_HepG2_1	no	DCF	HepG2	1
nuclear NFkB	270	-0.149176557503909	0.034824205664848	no_DCF_HepG2_1	no	DCF	HepG2	1
nuclear NFkB	288	-0.155455781673695	0.035042371233906	no_DCF_HepG2_1	no	DCF	HepG2	1
nuclear NFkB	312	-0.16412808535893	0.035345955592663	no_DCF_HepG2_1	no	DCF	HepG2	1
nuclear NFkB	336	-0.1566186075732	0.03508292392508	no_DCF_HepG2_1	no	DCF	HepG2	1
nuclear NFkB	360	-0.158251548630849	0.035139951639957	no_DCF_HepG2_1	no	DCF	HepG2	1
cytoplasmic NFkB	0	0.150800687895697	0.015931174104489	no_DCF_HepG2_1	no	DCF	HepG2	1
cytoplasmic NFkB	6	0.153892383596984	0.015882533441034	no_DCF_HepG2_1	no	DCF	HepG2	1
cytoplasmic NFkB	12	0.116019595913583	0.016488975325516	no_DCF_HepG2_1	no	DCF	HepG2	1
cytoplasmic NFkB	18	0.105946425566807	0.016654218168905	no_DCF_HepG2_1	no	DCF	HepG2	1
cytoplasmic NFkB	30	0.100502192782824	0.016744229125457	no_DCF_HepG2_1	no	DCF	HepG2	1
cytoplasmic NFkB	36	0.100171733550319	0.016749708516362	no_DCF_HepG2_1	no	DCF	HepG2	1
cytoplasmic NFkB	42	0.093822733382061	0.016855340499195	no_DCF_HepG2_1	no	DCF	HepG2	1
cytoplasmic NFkB	54	0.084959107846465	0.017003946942303	no_DCF_HepG2_1	no	DCF	HepG2	1
cytoplasmic NFkB	60	0.085107016275447	0.017001456240594	no_DCF_HepG2_1	no	DCF	HepG2	1
cytoplasmic NFkB	72	0.079313621324808	0.017099294080322	no_DCF_HepG2_1	no	DCF	HepG2	1
cytoplasmic NFkB	84	0.085683950065211	0.016991744267875	no_DCF_HepG2_1	no	DCF	HepG2	1
cytoplasmic NFkB	96	0.079662505556806	0.017093386171844	no_DCF_HepG2_1	no	DCF	HepG2	1
cytoplasmic NFkB	108	0.076595078384421	0.017145401914039	no_DCF_HepG2_1	no	DCF	HepG2	1
cytoplasmic NFkB	126	0.070383146278239	0.017251235767663	no_DCF_HepG2_1	no	DCF	HepG2	1
cytoplasmic NFkB	138	0.073189382927244	0.017203343274773	no_DCF_HepG2_1	no	DCF	HepG2	1
cytoplasmic NFkB	156	0.063172681737643	0.017374916653882	no_DCF_HepG2_1	no	DCF	HepG2	1
cytoplasmic NFkB	174	0.058233274725888	0.017460162954169	no_DCF_HepG2_1	no	DCF	HepG2	1
cytoplasmic NFkB	186	0.055198822612592	0.017512743868529	no_DCF_HepG2_1	no	DCF	HepG2	1
cytoplasmic NFkB	210	0.044840599842741	0.017693448630376	no_DCF_HepG2_1	no	DCF	HepG2	1
cytoplasmic NFkB	228	0.039408146090317	0.017788978442261	no_DCF_HepG2_1	no	DCF	HepG2	1
cytoplasmic NFkB	246	0.031925298346046	0.017921424249402	no_DCF_HepG2_1	no	DCF	HepG2	1
cytoplasmic NFkB	270	0.027107367562737	0.018007232101489	no_DCF_HepG2_1	no	DCF	HepG2	1
cytoplasmic NFkB	288	0.022898347660922	0.018082536936379	no_DCF_HepG2_1	no	DCF	HepG2	1
cytoplasmic NFkB	312	0.016862560178597	0.018191084422897	no_DCF_HepG2_1	no	DCF	HepG2	1
cytoplasmic NFkB	336	0.012149756936473	0.018276299958638	no_DCF_HepG2_1	no	DCF	HepG2	1
cytoplasmic NFkB	360	0.010311391581243	0.018309650756582	no_DCF_HepG2_1	no	DCF	HepG2	1
A20	40	-0.474357041026592	0.030848900734837	no_DCF_HepG2_1	no	DCF	HepG2	1
A20	50	-0.49576420776573	0.031505376955199	no_DCF_HepG2_1	no	DCF	HepG2	1
A20	60	-0.478483355831695	0.030974330334978	no_DCF_HepG2_1	no	DCF	HepG2	1
A20	70	-0.462976938768133	0.030505689123371	no_DCF_HepG2_1	no	DCF	HepG2	1
A20	80	-0.508176961191367	0.031892620607362	no_DCF_HepG2_1	no	DCF	HepG2	1
A20	100	-0.515660631339149	0.032128460670956	no_DCF_HepG2_1	no	DCF	HepG2	1
A20	110	-0.499149018659522	0.031610489788768	no_DCF_HepG2_1	no	DCF	HepG2	1
A20	120	-0.490901524378553	0.031355000824604	no_DCF_HepG2_1	no	DCF	HepG2	1
A20	140	-0.431934413765697	0.029589432110391	no_DCF_HepG2_1	no	DCF	HepG2	1
A20	150	-0.425210946357986	0.029394766788989	no_DCF_HepG2_1	no	DCF	HepG2	1
A20	170	-0.481058749122134	0.03105288267299	no_DCF_HepG2_1	no	DCF	HepG2	1
A20	190	-0.438190348600629	0.029771761878936	no_DCF_HepG2_1	no	DCF	HepG2	1
A20	210	-0.445433215827764	0.029984311054278	no_DCF_HepG2_1	no	DCF	HepG2	1
A20	230	-0.461570254233282	0.03046354014873	no_DCF_HepG2_1	no	DCF	HepG2	1
A20	250	-0.428434566145868	0.02948793418655	no_DCF_HepG2_1	no	DCF	HepG2	1
A20	270	-0.443472474329965	0.029926616560041	no_DCF_HepG2_1	no	DCF	HepG2	1
A20	290	-0.457732609205569	0.030348858003603	no_DCF_HepG2_1	no	DCF	HepG2	1
A20	310	-0.419123543072735	0.029219663299845	no_DCF_HepG2_1	no	DCF	HepG2	1
A20	340	-0.457966409532756	0.030355831783555	no_DCF_HepG2_1	no	DCF	HepG2	1
IkBa	0	1.03132001738511	0.203998381217447	TNF_no_PHH_2	TNF	no	PHH	2
IkBa	5	0.049553870891049	0.211233835159318	TNF_no_PHH_2	TNF	no	PHH	2
IkBa	10	-0.431639594844481	0.215762143458864	TNF_no_PHH_2	TNF	no	PHH	2
IkBa	15	-0.688238624380064	0.222095422002486	TNF_no_PHH_2	TNF	no	PHH	2
IkBa	20	-0.96675462409854	0.226258682636276	TNF_no_PHH_2	TNF	no	PHH	2
IkBa	30	-0.710756197714927	0.215794155540978	TNF_no_PHH_2	TNF	no	PHH	2
IkBa	40	-0.490734409700726	0.22452795561402	TNF_no_PHH_2	TNF	no	PHH	2
IkBa	50	-0.271650516968104	0.220967859878161	TNF_no_PHH_2	TNF	no	PHH	2
IkBa	60	0.222571043263958	0.213518668811814	TNF_no_PHH_2	TNF	no	PHH	2
IkBa	70	0.421303516401292	0.209262622920551	TNF_no_PHH_2	TNF	no	PHH	2
IkBa	90	0.929782884652499	0.220211896301803	TNF_no_PHH_2	TNF	no	PHH	2
pIkBa	0	-0.529109749435079	0.182763182394941	TNF_no_PHH_2	TNF	no	PHH	2
pIkBa	5	0.867676256572864	0.165212483738152	TNF_no_PHH_2	TNF	no	PHH	2
pIkBa	10	0.321983766445949	0.175701898164512	TNF_no_PHH_2	TNF	no	PHH	2
pIkBa	15	-0.163960578122775	0.17649168625394	TNF_no_PHH_2	TNF	no	PHH	2
pIkBa	20	-0.54033517075515	0.182864029176865	TNF_no_PHH_2	TNF	no	PHH	2
pIkBa	30	-0.601129649524506	0.1830347008661	TNF_no_PHH_2	TNF	no	PHH	2
pIkBa	40	-0.209557291947901	0.17777228852446	TNF_no_PHH_2	TNF	no	PHH	2
pIkBa	50	-0.222954016115365	0.181439806448885	TNF_no_PHH_2	TNF	no	PHH	2
pIkBa	60	0.598256655628066	0.180047482442495	TNF_no_PHH_2	TNF	no	PHH	2
pIkBa	70	0.682787926477214	0.171637636325959	TNF_no_PHH_2	TNF	no	PHH	2
pIkBa	90	0.267127811311633	0.17082521014713	TNF_no_PHH_2	TNF	no	PHH	2
pIKK	0	-1.22990461417969	0.188747966456708	TNF_no_PHH_2	TNF	no	PHH	2
pIKK	5	0.361761200070577	0.178444284984991	TNF_no_PHH_2	TNF	no	PHH	2
pIKK	10	0.680165415365991	0.180228390641596	TNF_no_PHH_2	TNF	no	PHH	2
pIKK	15	0.865756178948639	0.179593724788979	TNF_no_PHH_2	TNF	no	PHH	2
pIKK	20	0.451253229348142	0.177543114003762	TNF_no_PHH_2	TNF	no	PHH	2
pIKK	30	0.358313040094256	0.217305030674021	TNF_no_PHH_2	TNF	no	PHH	2
pIKK	40	0.006644399697379	0.184623332763086	TNF_no_PHH_2	TNF	no	PHH	2
pIKK	50	-0.015432711164975	0.183411942647311	TNF_no_PHH_2	TNF	no	PHH	2
pIKK	60	-0.268258783781876	0.184596099541426	TNF_no_PHH_2	TNF	no	PHH	2
pIKK	70	-0.351116226525111	0.191497360896656	TNF_no_PHH_2	TNF	no	PHH	2
pIKK	90	-0.790821572100352	0.192794972666273	TNF_no_PHH_2	TNF	no	PHH	2
pNFkB	0	-1.00349442316326	0.204567729908658	TNF_no_PHH_2	TNF	no	PHH	2
pNFkB	5	0.973990705168526	0.205556422356583	TNF_no_PHH_2	TNF	no	PHH	2
pNFkB	10	1.16202109358142	0.189798483899349	TNF_no_PHH_2	TNF	no	PHH	2
pNFkB	15	0.267582227447625	0.192100263383771	TNF_no_PHH_2	TNF	no	PHH	2
pNFkB	20	0.380394503498104	0.199828486543757	TNF_no_PHH_2	TNF	no	PHH	2
pNFkB	30	-0.102077939554145	0.194246020030327	TNF_no_PHH_2	TNF	no	PHH	2
pNFkB	40	-0.621429557340646	0.198343991212798	TNF_no_PHH_2	TNF	no	PHH	2
pNFkB	50	-0.084066947893751	0.196933852705551	TNF_no_PHH_2	TNF	no	PHH	2
pNFkB	60	-0.331792028997067	0.210168826610633	TNF_no_PHH_2	TNF	no	PHH	2
pNFkB	70	-0.443749229083321	0.198338019569986	TNF_no_PHH_2	TNF	no	PHH	2
pNFkB	90	-0.545609899540785	0.199734961342898	TNF_no_PHH_2	TNF	no	PHH	2
cytoplasmic NFkB	0	0.109500294293192	0.041896008694813	TNF_no_PHH_2	TNF	no	PHH	2
cytoplasmic NFkB	10	0.240761092213801	0.036997401794772	TNF_no_PHH_2	TNF	no	PHH	2
cytoplasmic NFkB	20	0.225276663704775	0.037540634011789	TNF_no_PHH_2	TNF	no	PHH	2
cytoplasmic NFkB	30	0.235472146199467	0.037181950409785	TNF_no_PHH_2	TNF	no	PHH	2
cytoplasmic NFkB	40	0.246343189690964	0.03680374241242	TNF_no_PHH_2	TNF	no	PHH	2
cytoplasmic NFkB	50	0.190522474344435	0.038792763627705	TNF_no_PHH_2	TNF	no	PHH	2
cytoplasmic NFkB	60	0.115858195153756	0.041642843313555	TNF_no_PHH_2	TNF	no	PHH	2
cytoplasmic NFkB	70	0.139350329549578	0.040721897839398	TNF_no_PHH_2	TNF	no	PHH	2
cytoplasmic NFkB	80	0.124353043252451	0.041307205904594	TNF_no_PHH_2	TNF	no	PHH	2
cytoplasmic NFkB	90	0.101621283893465	0.04221208962083	TNF_no_PHH_2	TNF	no	PHH	2
cytoplasmic NFkB	100	0.132747659696024	0.040978450877445	TNF_no_PHH_2	TNF	no	PHH	2
cytoplasmic NFkB	110	0.035541835651283	0.044967872908665	TNF_no_PHH_2	TNF	no	PHH	2
cytoplasmic NFkB	120	-0.061612245152119	0.049379366073434	TNF_no_PHH_2	TNF	no	PHH	2
cytoplasmic NFkB	140	0.086058099427475	0.042844137978005	TNF_no_PHH_2	TNF	no	PHH	2
cytoplasmic NFkB	160	0.102053382341083	0.042194687612012	TNF_no_PHH_2	TNF	no	PHH	2
cytoplasmic NFkB	180	0.138144208369448	0.040768629981107	TNF_no_PHH_2	TNF	no	PHH	2
cytoplasmic NFkB	200	0.111044823827523	0.041834352371059	TNF_no_PHH_2	TNF	no	PHH	2
cytoplasmic NFkB	220	0.115458133863811	0.041658723819523	TNF_no_PHH_2	TNF	no	PHH	2
cytoplasmic NFkB	240	0.035599292569386	0.044965393549322	TNF_no_PHH_2	TNF	no	PHH	2
cytoplasmic NFkB	260	0.034248414004967	0.045023729902821	TNF_no_PHH_2	TNF	no	PHH	2
cytoplasmic NFkB	280	-0.03156822297933	0.047967420228244	TNF_no_PHH_2	TNF	no	PHH	2
cytoplasmic NFkB	300	0.035143240018947	0.044985078599838	TNF_no_PHH_2	TNF	no	PHH	2
cytoplasmic NFkB	320	0.046481445423709	0.044498435898665	TNF_no_PHH_2	TNF	no	PHH	2
cytoplasmic NFkB	340	-0.021343161360849	0.047496810986907	TNF_no_PHH_2	TNF	no	PHH	2
nuclear NFkB	0	-0.336356079792809	0.078637201835135	TNF_no_PHH_2	TNF	no	PHH	2
nuclear NFkB	10	-0.113521961776455	0.063278214107129	TNF_no_PHH_2	TNF	no	PHH	2
nuclear NFkB	20	0.148223168157484	0.049215461626569	TNF_no_PHH_2	TNF	no	PHH	2
nuclear NFkB	30	0.205302348742789	0.046626863196875	TNF_no_PHH_2	TNF	no	PHH	2
nuclear NFkB	40	0.238119634741844	0.045207669819771	TNF_no_PHH_2	TNF	no	PHH	2
nuclear NFkB	50	0.188308696292329	0.047381332264084	TNF_no_PHH_2	TNF	no	PHH	2
nuclear NFkB	60	0.134859321947423	0.049844313733611	TNF_no_PHH_2	TNF	no	PHH	2
nuclear NFkB	70	0.159670438852204	0.048683771687119	TNF_no_PHH_2	TNF	no	PHH	2
nuclear NFkB	80	0.142581503065843	0.049479860963895	TNF_no_PHH_2	TNF	no	PHH	2
nuclear NFkB	90	0.056372162421863	0.053720667529808	TNF_no_PHH_2	TNF	no	PHH	2
nuclear NFkB	100	0.02204576818954	0.055518386581697	TNF_no_PHH_2	TNF	no	PHH	2
nuclear NFkB	110	-0.149012568875218	0.065495578421837	TNF_no_PHH_2	TNF	no	PHH	2
nuclear NFkB	120	-0.196127737877988	0.068567067312164	TNF_no_PHH_2	TNF	no	PHH	2
nuclear NFkB	140	-0.067468899023436	0.060519248306583	TNF_no_PHH_2	TNF	no	PHH	2
nuclear NFkB	160	0.068929025082124	0.053078943791698	TNF_no_PHH_2	TNF	no	PHH	2
nuclear NFkB	180	0.106493300028788	0.051208683206809	TNF_no_PHH_2	TNF	no	PHH	2
nuclear NFkB	200	0.075538233232336	0.052744539562967	TNF_no_PHH_2	TNF	no	PHH	2
nuclear NFkB	220	0.167199067015229	0.048337563449846	TNF_no_PHH_2	TNF	no	PHH	2
nuclear NFkB	240	0.094484047183384	0.051798636554052	TNF_no_PHH_2	TNF	no	PHH	2
nuclear NFkB	260	0.06298877622365	0.053381475747688	TNF_no_PHH_2	TNF	no	PHH	2
nuclear NFkB	280	0.050872855486318	0.054004368146121	TNF_no_PHH_2	TNF	no	PHH	2
nuclear NFkB	300	0.105738590572025	0.051245540559456	TNF_no_PHH_2	TNF	no	PHH	2
nuclear NFkB	320	0.041014994171948	0.054517006036526	TNF_no_PHH_2	TNF	no	PHH	2
nuclear NFkB	340	-0.098159294173153	0.062343251250215	TNF_no_PHH_2	TNF	no	PHH	2
IkBa	0	0.983981797669663	0.203607043202503	TNF_DCF_PHH_2	TNF	DCF	PHH	2
IkBa	5	0.513345507682607	0.205991221589821	TNF_DCF_PHH_2	TNF	DCF	PHH	2
IkBa	10	-0.226668777254185	0.21706215053112	TNF_DCF_PHH_2	TNF	DCF	PHH	2
IkBa	15	-0.658733404705225	0.217595765818312	TNF_DCF_PHH_2	TNF	DCF	PHH	2
IkBa	20	-0.50530599124359	0.241659313743507	TNF_DCF_PHH_2	TNF	DCF	PHH	2
IkBa	30	-0.764477711092313	0.215624423831526	TNF_DCF_PHH_2	TNF	DCF	PHH	2
IkBa	40	-0.710385910059412	0.21405500424357	TNF_DCF_PHH_2	TNF	DCF	PHH	2
IkBa	50	-0.978705621773175	0.229957118732623	TNF_DCF_PHH_2	TNF	DCF	PHH	2
IkBa	60	-0.681185462961568	0.233992661251121	TNF_DCF_PHH_2	TNF	DCF	PHH	2
IkBa	70	-0.762120038200488	0.222618892726223	TNF_DCF_PHH_2	TNF	DCF	PHH	2
IkBa	90	-0.13930701374282	0.217121207184875	TNF_DCF_PHH_2	TNF	DCF	PHH	2
pIkBa	0	-0.380622106027938	0.177197956734248	TNF_DCF_PHH_2	TNF	DCF	PHH	2
pIkBa	5	0.745503562230619	0.173969778755517	TNF_DCF_PHH_2	TNF	DCF	PHH	2
pIkBa	10	0.318956206899453	0.181574001539736	TNF_DCF_PHH_2	TNF	DCF	PHH	2
pIkBa	15	-0.194093459018946	0.179230230892558	TNF_DCF_PHH_2	TNF	DCF	PHH	2
pIkBa	20	-0.425768092001634	0.182946966817233	TNF_DCF_PHH_2	TNF	DCF	PHH	2
pIkBa	30	-0.580777250248105	0.177201198910037	TNF_DCF_PHH_2	TNF	DCF	PHH	2
pIkBa	40	-0.622183310696457	0.177857991729927	TNF_DCF_PHH_2	TNF	DCF	PHH	2
pIkBa	50	-0.711953714915153	0.180576700723135	TNF_DCF_PHH_2	TNF	DCF	PHH	2
pIkBa	60	-0.602209416031465	0.184907793740614	TNF_DCF_PHH_2	TNF	DCF	PHH	2
pIkBa	70	-0.689681692736983	0.178562917236966	TNF_DCF_PHH_2	TNF	DCF	PHH	2
pIkBa	90	-0.393416161851914	0.190645239278858	TNF_DCF_PHH_2	TNF	DCF	PHH	2
pIKK	0	-1.08133904720993	0.197053948101208	TNF_DCF_PHH_2	TNF	DCF	PHH	2
pIKK	5	0.236327700331048	0.189561192843666	TNF_DCF_PHH_2	TNF	DCF	PHH	2
pIKK	10	0.443793682269833	0.182765604580963	TNF_DCF_PHH_2	TNF	DCF	PHH	2
pIKK	15	0.680173957624243	0.193020058321639	TNF_DCF_PHH_2	TNF	DCF	PHH	2
pIKK	20	-0.428122885980451	0.184791416870614	TNF_DCF_PHH_2	TNF	DCF	PHH	2
pIKK	30	-0.685168698240749	0.185818980424977	TNF_DCF_PHH_2	TNF	DCF	PHH	2
pIKK	40	-0.514128688957978	0.190127209013077	TNF_DCF_PHH_2	TNF	DCF	PHH	2
pIKK	50	-0.735565070363644	0.186219214738936	TNF_DCF_PHH_2	TNF	DCF	PHH	2
pIKK	60	-0.73688057881598	0.186348292361443	TNF_DCF_PHH_2	TNF	DCF	PHH	2
pIKK	70	-0.560486181347266	0.201584111737943	TNF_DCF_PHH_2	TNF	DCF	PHH	2
pIKK	90	-0.535974026223084	0.205625945672473	TNF_DCF_PHH_2	TNF	DCF	PHH	2
pNFkB	0	-1.04695065802367	0.212394171883762	TNF_DCF_PHH_2	TNF	DCF	PHH	2
pNFkB	5	0.257418980645641	0.193282050376456	TNF_DCF_PHH_2	TNF	DCF	PHH	2
pNFkB	10	0.811323548564247	0.197357687593056	TNF_DCF_PHH_2	TNF	DCF	PHH	2
pNFkB	15	0.344999957499676	0.193893089191185	TNF_DCF_PHH_2	TNF	DCF	PHH	2
pNFkB	20	-0.175934385647666	0.244705946929603	TNF_DCF_PHH_2	TNF	DCF	PHH	2
pNFkB	30	-0.362164925771229	0.205703564380696	TNF_DCF_PHH_2	TNF	DCF	PHH	2
pNFkB	40	-0.798956979969107	0.210491704100932	TNF_DCF_PHH_2	TNF	DCF	PHH	2
pNFkB	50	-0.862536877471015	0.202324117407131	TNF_DCF_PHH_2	TNF	DCF	PHH	2
pNFkB	60	-1.07495217153287	0.199460051941391	TNF_DCF_PHH_2	TNF	DCF	PHH	2
pNFkB	70	-1.18965726876683	0.200426953430117	TNF_DCF_PHH_2	TNF	DCF	PHH	2
pNFkB	90	-1.01951723186477	0.199204965890235	TNF_DCF_PHH_2	TNF	DCF	PHH	2
cytoplasmic NFkB	0	-0.217956064794768	0.057476194072163	TNF_DCF_PHH_2	TNF	DCF	PHH	2
cytoplasmic NFkB	10	-0.108551039136473	0.051674913142805	TNF_DCF_PHH_2	TNF	DCF	PHH	2
cytoplasmic NFkB	20	-0.000276869404132	0.046542813440557	TNF_DCF_PHH_2	TNF	DCF	PHH	2
cytoplasmic NFkB	30	0.035438853472993	0.04497231721561	TNF_DCF_PHH_2	TNF	DCF	PHH	2
cytoplasmic NFkB	40	0.137226789462491	0.040804216421169	TNF_DCF_PHH_2	TNF	DCF	PHH	2
cytoplasmic NFkB	50	0.140959935344375	0.040659624319932	TNF_DCF_PHH_2	TNF	DCF	PHH	2
cytoplasmic NFkB	60	0.067705298838426	0.043602797950062	TNF_DCF_PHH_2	TNF	DCF	PHH	2
cytoplasmic NFkB	70	-0.0283401917744	0.047818311197534	TNF_DCF_PHH_2	TNF	DCF	PHH	2
cytoplasmic NFkB	80	-0.032022011502697	0.047988421505141	TNF_DCF_PHH_2	TNF	DCF	PHH	2
cytoplasmic NFkB	90	-0.026452342235203	0.047731338333914	TNF_DCF_PHH_2	TNF	DCF	PHH	2
cytoplasmic NFkB	100	0.042921880332097	0.044650596488824	TNF_DCF_PHH_2	TNF	DCF	PHH	2
cytoplasmic NFkB	110	-0.049789339716114	0.048818496751243	TNF_DCF_PHH_2	TNF	DCF	PHH	2
cytoplasmic NFkB	120	-0.395987841327379	0.068422070021498	TNF_DCF_PHH_2	TNF	DCF	PHH	2
cytoplasmic NFkB	140	-0.324334178774601	0.063776227363826	TNF_DCF_PHH_2	TNF	DCF	PHH	2
cytoplasmic NFkB	160	-0.291351668179253	0.061749159273228	TNF_DCF_PHH_2	TNF	DCF	PHH	2
cytoplasmic NFkB	180	-0.268137469307857	0.060362831521124	TNF_DCF_PHH_2	TNF	DCF	PHH	2
cytoplasmic NFkB	200	-0.160783183003391	0.054363299996941	TNF_DCF_PHH_2	TNF	DCF	PHH	2
cytoplasmic NFkB	220	-0.108843471337358	0.051689565743918	TNF_DCF_PHH_2	TNF	DCF	PHH	2
cytoplasmic NFkB	240	-0.090415653355092	0.050774797293462	TNF_DCF_PHH_2	TNF	DCF	PHH	2
cytoplasmic NFkB	260	-0.147805901999268	0.053681812539102	TNF_DCF_PHH_2	TNF	DCF	PHH	2
cytoplasmic NFkB	280	-0.19041869781573	0.055954064087239	TNF_DCF_PHH_2	TNF	DCF	PHH	2
cytoplasmic NFkB	300	-0.178324830158013	0.055299042905994	TNF_DCF_PHH_2	TNF	DCF	PHH	2
cytoplasmic NFkB	320	-0.187845163998571	0.055813995856151	TNF_DCF_PHH_2	TNF	DCF	PHH	2
cytoplasmic NFkB	340	-0.303867698388025	0.062510356608778	TNF_DCF_PHH_2	TNF	DCF	PHH	2
nuclear NFkB	0	-0.159469016453009	0.066164465994503	TNF_DCF_PHH_2	TNF	DCF	PHH	2
nuclear NFkB	10	-0.08452261594864	0.061525652130026	TNF_DCF_PHH_2	TNF	DCF	PHH	2
nuclear NFkB	20	0.090177415318636	0.052012011190054	TNF_DCF_PHH_2	TNF	DCF	PHH	2
nuclear NFkB	30	0.13830548356506	0.049681305328312	TNF_DCF_PHH_2	TNF	DCF	PHH	2
nuclear NFkB	40	0.262775006511178	0.044173440834547	TNF_DCF_PHH_2	TNF	DCF	PHH	2
nuclear NFkB	50	0.269812056612752	0.043883188269166	TNF_DCF_PHH_2	TNF	DCF	PHH	2
nuclear NFkB	60	0.140454312240722	0.049579960538703	TNF_DCF_PHH_2	TNF	DCF	PHH	2
nuclear NFkB	70	0.125723165015821	0.050279330803679	TNF_DCF_PHH_2	TNF	DCF	PHH	2
nuclear NFkB	80	0.095733137326212	0.051736929375539	TNF_DCF_PHH_2	TNF	DCF	PHH	2
nuclear NFkB	90	0.103331530395723	0.05136328679188	TNF_DCF_PHH_2	TNF	DCF	PHH	2
nuclear NFkB	100	0.134432297209709	0.049864553971385	TNF_DCF_PHH_2	TNF	DCF	PHH	2
nuclear NFkB	110	-0.062306621881714	0.060218082774641	TNF_DCF_PHH_2	TNF	DCF	PHH	2
nuclear NFkB	120	-0.483996447405277	0.090916978880297	TNF_DCF_PHH_2	TNF	DCF	PHH	2
nuclear NFkB	140	-0.296624233960481	0.075635930454028	TNF_DCF_PHH_2	TNF	DCF	PHH	2
nuclear NFkB	160	-0.327008611739887	0.077920125756728	TNF_DCF_PHH_2	TNF	DCF	PHH	2
nuclear NFkB	180	-0.246072569945642	0.071989290894491	TNF_DCF_PHH_2	TNF	DCF	PHH	2
nuclear NFkB	200	-0.109796764628368	0.063050138987886	TNF_DCF_PHH_2	TNF	DCF	PHH	2
nuclear NFkB	220	-0.079708924937929	0.0612397803811	TNF_DCF_PHH_2	TNF	DCF	PHH	2
nuclear NFkB	240	-0.069874070224971	0.060660115220328	TNF_DCF_PHH_2	TNF	DCF	PHH	2
nuclear NFkB	260	-0.107066229268698	0.062883516948027	TNF_DCF_PHH_2	TNF	DCF	PHH	2
nuclear NFkB	280	-0.189488871716896	0.068125225170754	TNF_DCF_PHH_2	TNF	DCF	PHH	2
nuclear NFkB	300	-0.194751269953257	0.068475210511415	TNF_DCF_PHH_2	TNF	DCF	PHH	2
nuclear NFkB	320	-0.15704914110639	0.066009028476368	TNF_DCF_PHH_2	TNF	DCF	PHH	2
nuclear NFkB	340	-0.465819359144524	0.08930378843246	TNF_DCF_PHH_2	TNF	DCF	PHH	2
IkBa	0	0.450830619942668	0.112843304293083	TNF_no_HepG2_3	TNF	no	HepG2	3
IkBa	2	0.578545951162659	0.114688261193531	TNF_no_HepG2_3	TNF	no	HepG2	3
IkBa	5	0.141391095769471	0.110465560744117	TNF_no_HepG2_3	TNF	no	HepG2	3
IkBa	7	-0.256360286617817	0.119267945471876	TNF_no_HepG2_3	TNF	no	HepG2	3
IkBa	10	-1.11093628721866	0.120504899898564	TNF_no_HepG2_3	TNF	no	HepG2	3
IkBa	15	-1.64070244546205	0.125238205072685	TNF_no_HepG2_3	TNF	no	HepG2	3
IkBa	20	-1.81146685556852	0.120252963749556	TNF_no_HepG2_3	TNF	no	HepG2	3
IkBa	30	-0.724092859277677	0.114434694513542	TNF_no_HepG2_3	TNF	no	HepG2	3
IkBa	50	1.38169806451461	0.129160177417174	TNF_no_HepG2_3	TNF	no	HepG2	3
pIkBa	0	-1.91114293754476	0.103456245935835	TNF_no_HepG2_3	TNF	no	HepG2	3
pIkBa	2	-1.36392538363056	0.100779397233235	TNF_no_HepG2_3	TNF	no	HepG2	3
pIkBa	5	0.694361542344004	0.091619232552325	TNF_no_HepG2_3	TNF	no	HepG2	3
pIkBa	7	0.857920995297622	0.091869516119617	TNF_no_HepG2_3	TNF	no	HepG2	3
pIkBa	10	0.26813013985156	0.093408354859312	TNF_no_HepG2_3	TNF	no	HepG2	3
pIkBa	15	-1.04859916945844	0.095351267493116	TNF_no_HepG2_3	TNF	no	HepG2	3
pIkBa	20	-1.31793519552166	0.097273990141553	TNF_no_HepG2_3	TNF	no	HepG2	3
pIkBa	30	-0.398952963513076	0.095023841308627	TNF_no_HepG2_3	TNF	no	HepG2	3
pIkBa	50	0.698698407019112	0.096205330500128	TNF_no_HepG2_3	TNF	no	HepG2	3
pIKK	0	-0.888371081821955	0.089568642798952	TNF_no_HepG2_3	TNF	no	HepG2	3
pIKK	2	-0.764086413809759	0.090041910197456	TNF_no_HepG2_3	TNF	no	HepG2	3
pIKK	5	-0.247077101643066	0.089296276786596	TNF_no_HepG2_3	TNF	no	HepG2	3
pIKK	7	0.206838605535178	0.084884383273648	TNF_no_HepG2_3	TNF	no	HepG2	3
pIKK	10	0.147727413100332	0.083753252884282	TNF_no_HepG2_3	TNF	no	HepG2	3
pIKK	15	0.102597698480713	0.083928041248101	TNF_no_HepG2_3	TNF	no	HepG2	3
pIKK	20	0.047526977343902	0.085012148073982	TNF_no_HepG2_3	TNF	no	HepG2	3
pIKK	30	-0.377233506054664	0.084476759708864	TNF_no_HepG2_3	TNF	no	HepG2	3
pIKK	50	-0.381226019271834	0.085595881822002	TNF_no_HepG2_3	TNF	no	HepG2	3
pNFkB	0	-1.90554831344729	0.117154539076443	TNF_no_HepG2_3	TNF	no	HepG2	3
pNFkB	2	-1.30030042062919	0.115862694384607	TNF_no_HepG2_3	TNF	no	HepG2	3
pNFkB	5	0.23226145707477	0.107972004933027	TNF_no_HepG2_3	TNF	no	HepG2	3
pNFkB	7	0.715588978201116	0.104535517618246	TNF_no_HepG2_3	TNF	no	HepG2	3
pNFkB	10	0.532746621728616	0.104595066607747	TNF_no_HepG2_3	TNF	no	HepG2	3
pNFkB	15	0.090376189175897	0.108145236529698	TNF_no_HepG2_3	TNF	no	HepG2	3
pNFkB	20	-0.368204631268643	0.110058635985522	TNF_no_HepG2_3	TNF	no	HepG2	3
pNFkB	30	-0.478707148692524	0.109463345251278	TNF_no_HepG2_3	TNF	no	HepG2	3
pNFkB	50	-0.356527717843693	0.108370834176117	TNF_no_HepG2_3	TNF	no	HepG2	3
IkBa	0	0.526523088949714	0.204731932854653	TNF_AMD_HepG2_3	TNF	AMD	HepG2	3
IkBa	2	0.62622297369074	0.211284424794948	TNF_AMD_HepG2_3	TNF	AMD	HepG2	3
IkBa	5	0.21671200007842	0.208820599313289	TNF_AMD_HepG2_3	TNF	AMD	HepG2	3
IkBa	7	-0.133569955388687	0.221677900075644	TNF_AMD_HepG2_3	TNF	AMD	HepG2	3
IkBa	10	-0.578885819815336	0.228132221390163	TNF_AMD_HepG2_3	TNF	AMD	HepG2	3
IkBa	15	-1.39427793908108	0.218660264125636	TNF_AMD_HepG2_3	TNF	AMD	HepG2	3
IkBa	20	-2.06721317880111	0.214735154956911	TNF_AMD_HepG2_3	TNF	AMD	HepG2	3
IkBa	30	-0.886073781294914	0.214144676812275	TNF_AMD_HepG2_3	TNF	AMD	HepG2	3
IkBa	50	0.614772620671226	0.209492801258374	TNF_AMD_HepG2_3	TNF	AMD	HepG2	3
pIkBa	0	-1.7153123590319	0.174805746930703	TNF_AMD_HepG2_3	TNF	AMD	HepG2	3
pIkBa	2	-1.75142707994324	0.185646575125102	TNF_AMD_HepG2_3	TNF	AMD	HepG2	3
pIkBa	5	0.355546072112545	0.17653586692432	TNF_AMD_HepG2_3	TNF	AMD	HepG2	3
pIkBa	7	0.689457394278996	0.169672997677565	TNF_AMD_HepG2_3	TNF	AMD	HepG2	3
pIkBa	10	0.546956573419444	0.178530728708639	TNF_AMD_HepG2_3	TNF	AMD	HepG2	3
pIkBa	15	-0.367222227627914	0.17646640776857	TNF_AMD_HepG2_3	TNF	AMD	HepG2	3
pIkBa	20	-1.25138610628774	0.178618371351955	TNF_AMD_HepG2_3	TNF	AMD	HepG2	3
pIkBa	30	-0.406165073878264	0.174109466978595	TNF_AMD_HepG2_3	TNF	AMD	HepG2	3
pIkBa	50	0.401953284533497	0.173568671791302	TNF_AMD_HepG2_3	TNF	AMD	HepG2	3
pIKK	0	-0.468079084682135	0.179456359471726	TNF_AMD_HepG2_3	TNF	AMD	HepG2	3
pIKK	2	-1.00917281310464	0.161642206607021	TNF_AMD_HepG2_3	TNF	AMD	HepG2	3
pIKK	5	-0.549238676931135	0.165013923000771	TNF_AMD_HepG2_3	TNF	AMD	HepG2	3
pIKK	7	-0.08295222663682	0.157667187442948	TNF_AMD_HepG2_3	TNF	AMD	HepG2	3
pIKK	10	0.294413987935275	0.159110147022981	TNF_AMD_HepG2_3	TNF	AMD	HepG2	3
pIKK	15	0.135628775876189	0.155434629441863	TNF_AMD_HepG2_3	TNF	AMD	HepG2	3
pIKK	20	0.054658347266999	0.16543737980021	TNF_AMD_HepG2_3	TNF	AMD	HepG2	3
pIKK	30	-0.608129981460486	0.158853088381646	TNF_AMD_HepG2_3	TNF	AMD	HepG2	3
pIKK	50	-0.593856725563061	0.16102427070873	TNF_AMD_HepG2_3	TNF	AMD	HepG2	3
pNFkB	0	-1.51128762369301	0.218083823002551	TNF_AMD_HepG2_3	TNF	AMD	HepG2	3
pNFkB	2	-1.96992431946254	0.205917970871043	TNF_AMD_HepG2_3	TNF	AMD	HepG2	3
pNFkB	5	-0.575690342425292	0.204168603882571	TNF_AMD_HepG2_3	TNF	AMD	HepG2	3
pNFkB	7	0.361517788675542	0.212518499815904	TNF_AMD_HepG2_3	TNF	AMD	HepG2	3
pNFkB	10	0.247581541092973	0.212321029129233	TNF_AMD_HepG2_3	TNF	AMD	HepG2	3
pNFkB	15	-0.012260983504178	0.221152927995523	TNF_AMD_HepG2_3	TNF	AMD	HepG2	3
pNFkB	20	-0.660465628718933	0.215357621123649	TNF_AMD_HepG2_3	TNF	AMD	HepG2	3
pNFkB	30	-1.4360155198963	0.209614130849108	TNF_AMD_HepG2_3	TNF	AMD	HepG2	3
pNFkB	50	-0.5468418152887	0.198352127972386	TNF_AMD_HepG2_3	TNF	AMD	HepG2	3
IkBa	0	0.64114469376127	0.266108313051955	TNF_APAP_HepG2_3	TNF	APAP	HepG2	3
IkBa	2	0.3055610598822	0.267795473558701	TNF_APAP_HepG2_3	TNF	APAP	HepG2	3
IkBa	5	-0.186618277247448	0.240356262647647	TNF_APAP_HepG2_3	TNF	APAP	HepG2	3
IkBa	7	-0.268690823826799	0.238920953863367	TNF_APAP_HepG2_3	TNF	APAP	HepG2	3
IkBa	10	-1.18925729199551	0.243033501327221	TNF_APAP_HepG2_3	TNF	APAP	HepG2	3
IkBa	15	-2.25341740634613	0.251335686556964	TNF_APAP_HepG2_3	TNF	APAP	HepG2	3
IkBa	20	-2.59609294895432	0.260331363697904	TNF_APAP_HepG2_3	TNF	APAP	HepG2	3
IkBa	30	-1.33892932652638	0.2441361889165	TNF_APAP_HepG2_3	TNF	APAP	HepG2	3
IkBa	50	0.594257345345673	0.249243714961886	TNF_APAP_HepG2_3	TNF	APAP	HepG2	3
pIkBa	0	-2.50931860476564	0.207651961922723	TNF_APAP_HepG2_3	TNF	APAP	HepG2	3
pIkBa	2	-2.20686103258903	0.240816544703592	TNF_APAP_HepG2_3	TNF	APAP	HepG2	3
pIkBa	5	0.35668185514878	0.205096859947729	TNF_APAP_HepG2_3	TNF	APAP	HepG2	3
pIkBa	7	0.955168493803906	0.194450489576643	TNF_APAP_HepG2_3	TNF	APAP	HepG2	3
pIkBa	10	0.209703622248634	0.204076304724866	TNF_APAP_HepG2_3	TNF	APAP	HepG2	3
pIkBa	15	-1.48994524305478	0.200233207321555	TNF_APAP_HepG2_3	TNF	APAP	HepG2	3
pIkBa	20	-2.17781739765614	0.21767140197391	TNF_APAP_HepG2_3	TNF	APAP	HepG2	3
pIkBa	30	-1.27162365303156	0.20822529762765	TNF_APAP_HepG2_3	TNF	APAP	HepG2	3
pIkBa	50	0.073898725414371	0.196141782311832	TNF_APAP_HepG2_3	TNF	APAP	HepG2	3
pIKK	0	-0.822804047013187	0.181043298256911	TNF_APAP_HepG2_3	TNF	APAP	HepG2	3
pIKK	2	-0.92996166222603	0.208379207644647	TNF_APAP_HepG2_3	TNF	APAP	HepG2	3
pIKK	5	-0.322402324973746	0.188132620249684	TNF_APAP_HepG2_3	TNF	APAP	HepG2	3
pIKK	7	0.195843905601326	0.186120316591257	TNF_APAP_HepG2_3	TNF	APAP	HepG2	3
pIKK	10	0.276448711098632	0.183263157962578	TNF_APAP_HepG2_3	TNF	APAP	HepG2	3
pIKK	15	0.270894156176388	0.185614368970206	TNF_APAP_HepG2_3	TNF	APAP	HepG2	3
pIKK	20	-0.273811073430643	0.17979328832635	TNF_APAP_HepG2_3	TNF	APAP	HepG2	3
pIKK	30	-0.512271568576108	0.188079192009256	TNF_APAP_HepG2_3	TNF	APAP	HepG2	3
pIKK	50	-0.204688680475586	0.184682399404239	TNF_APAP_HepG2_3	TNF	APAP	HepG2	3
pNFkB	0	-2.00675408333088	0.22345394065099	TNF_APAP_HepG2_3	TNF	APAP	HepG2	3
pNFkB	2	-1.80644304779346	0.229249019210132	TNF_APAP_HepG2_3	TNF	APAP	HepG2	3
pNFkB	5	0.266470310149996	0.217283844077613	TNF_APAP_HepG2_3	TNF	APAP	HepG2	3
pNFkB	7	0.456807582617309	0.21533735060206	TNF_APAP_HepG2_3	TNF	APAP	HepG2	3
pNFkB	10	0.4113369128219	0.215717792478295	TNF_APAP_HepG2_3	TNF	APAP	HepG2	3
pNFkB	15	0.000451932597198	0.219540041024744	TNF_APAP_HepG2_3	TNF	APAP	HepG2	3
pNFkB	20	-0.679119743569528	0.226450744562839	TNF_APAP_HepG2_3	TNF	APAP	HepG2	3
pNFkB	30	-1.04435494688658	0.227108272409838	TNF_APAP_HepG2_3	TNF	APAP	HepG2	3
pNFkB	50	-0.532675563726738	0.222928940917687	TNF_APAP_HepG2_3	TNF	APAP	HepG2	3
IkBa	0	0.749891102920002	0.232557323345125	TNF_FIAU_HepG2_3	TNF	FIAU	HepG2	3
IkBa	2	0.746277815752311	0.23634046453449	TNF_FIAU_HepG2_3	TNF	FIAU	HepG2	3
IkBa	5	0.152696862656001	0.238325475344546	TNF_FIAU_HepG2_3	TNF	FIAU	HepG2	3
IkBa	7	-0.395834301327879	0.236990568877845	TNF_FIAU_HepG2_3	TNF	FIAU	HepG2	3
IkBa	10	-1.55427617711446	0.239704136260022	TNF_FIAU_HepG2_3	TNF	FIAU	HepG2	3
IkBa	15	-1.52760818947987	0.252129557605462	TNF_FIAU_HepG2_3	TNF	FIAU	HepG2	3
IkBa	20	-2.03894516663008	0.245478077487594	TNF_FIAU_HepG2_3	TNF	FIAU	HepG2	3
IkBa	30	-1.24631829629555	0.245410246057332	TNF_FIAU_HepG2_3	TNF	FIAU	HepG2	3
IkBa	50	0.816049139455985	0.232073972977403	TNF_FIAU_HepG2_3	TNF	FIAU	HepG2	3
pIkBa	0	-1.59635056071441	0.211829532380132	TNF_FIAU_HepG2_3	TNF	FIAU	HepG2	3
pIkBa	2	-1.14927837816551	0.202564868826329	TNF_FIAU_HepG2_3	TNF	FIAU	HepG2	3
pIkBa	5	0.843770100096517	0.210113786287688	TNF_FIAU_HepG2_3	TNF	FIAU	HepG2	3
pIkBa	7	1.09876554241055	0.189688327429337	TNF_FIAU_HepG2_3	TNF	FIAU	HepG2	3
pIkBa	10	0.610242656705572	0.20025261609358	TNF_FIAU_HepG2_3	TNF	FIAU	HepG2	3
pIkBa	15	-0.452402142567524	0.223652983295435	TNF_FIAU_HepG2_3	TNF	FIAU	HepG2	3
pIkBa	20	-1.42149450721848	0.20001921965233	TNF_FIAU_HepG2_3	TNF	FIAU	HepG2	3
pIkBa	30	-1.03209112161974	0.198980472260156	TNF_FIAU_HepG2_3	TNF	FIAU	HepG2	3
pIkBa	50	0.733020493975954	0.194158640573623	TNF_FIAU_HepG2_3	TNF	FIAU	HepG2	3
pIKK	0	0.034297540476061	0.179639633072326	TNF_FIAU_HepG2_3	TNF	FIAU	HepG2	3
pIKK	2	0.114887836202622	0.174479635427192	TNF_FIAU_HepG2_3	TNF	FIAU	HepG2	3
pIKK	5	0.331913011464078	0.174989181481682	TNF_FIAU_HepG2_3	TNF	FIAU	HepG2	3
pIKK	7	0.661889747307632	0.173483647154728	TNF_FIAU_HepG2_3	TNF	FIAU	HepG2	3
pIKK	10	0.700876258491576	0.171904934435578	TNF_FIAU_HepG2_3	TNF	FIAU	HepG2	3
pIKK	15	0.689657821380728	0.173713273643713	TNF_FIAU_HepG2_3	TNF	FIAU	HepG2	3
pIKK	20	0.911097359650714	0.176491634474102	TNF_FIAU_HepG2_3	TNF	FIAU	HepG2	3
pIKK	30	0.509276500306319	0.172458424291981	TNF_FIAU_HepG2_3	TNF	FIAU	HepG2	3
pIKK	50	0.426672664607821	0.177757783789522	TNF_FIAU_HepG2_3	TNF	FIAU	HepG2	3
pNFkB	0	-1.04847897723946	0.22217823450056	TNF_FIAU_HepG2_3	TNF	FIAU	HepG2	3
pNFkB	2	-1.07193023802341	0.215419655684367	TNF_FIAU_HepG2_3	TNF	FIAU	HepG2	3
pNFkB	5	0.918647938936998	0.208562214256262	TNF_FIAU_HepG2_3	TNF	FIAU	HepG2	3
pNFkB	7	1.20830422340963	0.205238550272919	TNF_FIAU_HepG2_3	TNF	FIAU	HepG2	3
pNFkB	10	1.36528278003831	0.202106813283149	TNF_FIAU_HepG2_3	TNF	FIAU	HepG2	3
pNFkB	15	0.519247246760518	0.209831748867635	TNF_FIAU_HepG2_3	TNF	FIAU	HepG2	3
pNFkB	20	0.584654896067655	0.214476453860416	TNF_FIAU_HepG2_3	TNF	FIAU	HepG2	3
pNFkB	30	0.101114497244738	0.212282967553793	TNF_FIAU_HepG2_3	TNF	FIAU	HepG2	3
pNFkB	50	0.372331989190666	0.215851268017314	TNF_FIAU_HepG2_3	TNF	FIAU	HepG2	3
IkBa	0	0.439109064125984	0.207259655647047	TNF_XIM_HepG2_3	TNF	XIM	HepG2	3
IkBa	2	0.394153085851257	0.202847739226592	TNF_XIM_HepG2_3	TNF	XIM	HepG2	3
IkBa	5	-0.11340382624174	0.209185322513821	TNF_XIM_HepG2_3	TNF	XIM	HepG2	3
IkBa	7	-0.312556031568216	0.215337106675535	TNF_XIM_HepG2_3	TNF	XIM	HepG2	3
IkBa	10	-1.04036615215509	0.217349947580387	TNF_XIM_HepG2_3	TNF	XIM	HepG2	3
IkBa	15	-1.68983135949286	0.250017926299186	TNF_XIM_HepG2_3	TNF	XIM	HepG2	3
IkBa	20	-1.84598631756931	0.244327382516904	TNF_XIM_HepG2_3	TNF	XIM	HepG2	3
IkBa	30	-0.629646116751132	0.21311475407165	TNF_XIM_HepG2_3	TNF	XIM	HepG2	3
IkBa	50	1.17066113032251	0.201969511974932	TNF_XIM_HepG2_3	TNF	XIM	HepG2	3
pIkBa	0	-2.37294249788736	0.179116348825321	TNF_XIM_HepG2_3	TNF	XIM	HepG2	3
pIkBa	2	-1.48426876259959	0.189251191261112	TNF_XIM_HepG2_3	TNF	XIM	HepG2	3
pIkBa	5	0.848645164521385	0.168342610101243	TNF_XIM_HepG2_3	TNF	XIM	HepG2	3
pIkBa	7	0.941667950171826	0.165455088254827	TNF_XIM_HepG2_3	TNF	XIM	HepG2	3
pIkBa	10	0.197944453260038	0.17427516651039	TNF_XIM_HepG2_3	TNF	XIM	HepG2	3
pIkBa	15	-1.51174192624824	0.175352291732938	TNF_XIM_HepG2_3	TNF	XIM	HepG2	3
pIkBa	20	-1.11279656343208	0.196625367840134	TNF_XIM_HepG2_3	TNF	XIM	HepG2	3
pIkBa	30	-0.568552092664256	0.17261290085501	TNF_XIM_HepG2_3	TNF	XIM	HepG2	3
pIkBa	50	0.249269677839789	0.170651080776873	TNF_XIM_HepG2_3	TNF	XIM	HepG2	3
pIKK	0	-1.16257934981215	0.159922970383368	TNF_XIM_HepG2_3	TNF	XIM	HepG2	3
pIKK	2	-0.772084163157138	0.162827599672775	TNF_XIM_HepG2_3	TNF	XIM	HepG2	3
pIKK	5	0.113522508678529	0.172441523160986	TNF_XIM_HepG2_3	TNF	XIM	HepG2	3
pIKK	7	0.248024518749826	0.154046290312177	TNF_XIM_HepG2_3	TNF	XIM	HepG2	3
pIKK	10	0.045763393852065	0.157626897221872	TNF_XIM_HepG2_3	TNF	XIM	HepG2	3
pIKK	15	-0.15644388078933	0.15568316074613	TNF_XIM_HepG2_3	TNF	XIM	HepG2	3
pIKK	20	-0.038024905386842	0.155946413743671	TNF_XIM_HepG2_3	TNF	XIM	HepG2	3
pIKK	30	-0.274955951111658	0.156120104608471	TNF_XIM_HepG2_3	TNF	XIM	HepG2	3
pIKK	50	-0.302982433019529	0.157726779685961	TNF_XIM_HepG2_3	TNF	XIM	HepG2	3
pNFkB	0	-1.93834226141286	0.200634751821654	TNF_XIM_HepG2_3	TNF	XIM	HepG2	3
pNFkB	2	-1.26083987668683	0.202174081175005	TNF_XIM_HepG2_3	TNF	XIM	HepG2	3
pNFkB	5	0.225893546561941	0.198708749034065	TNF_XIM_HepG2_3	TNF	XIM	HepG2	3
pNFkB	7	0.366361041230676	0.190462833621984	TNF_XIM_HepG2_3	TNF	XIM	HepG2	3
pNFkB	10	0.412818680096785	0.193232192169406	TNF_XIM_HepG2_3	TNF	XIM	HepG2	3
pNFkB	15	-0.244578622540234	0.196460978011413	TNF_XIM_HepG2_3	TNF	XIM	HepG2	3
pNFkB	20	-0.708500805016895	0.193724178179442	TNF_XIM_HepG2_3	TNF	XIM	HepG2	3
pNFkB	30	-0.877335599494879	0.192698954209061	TNF_XIM_HepG2_3	TNF	XIM	HepG2	3
pNFkB	50	-0.612099793768588	0.197157414569799	TNF_XIM_HepG2_3	TNF	XIM	HepG2	3
